# Supplementary material for: Discovery and Photoisomerization of New Pyrrolosesquiterpenoids Glaciapyrroles D and E, from Deep-Sea Sediment Streptomyces sp.
Source: MDPI journal article supplement (doi:10.3390/md20050281), 2022-04-22
Supplement: s1 [file s1]

## *Supplementary Materials*

# **Discovery and Photoisomerization of New Pyrrolosesquiterpenoids Glaciapyrroles D and E, from Deep-Sea Sediment *Streptomyces* sp.**

Keebeom Ko,<sup>#,1</sup> Seong-Hwan Kim,<sup>#,2</sup> Subin Park,<sup>3</sup> Hwa Seung Han,<sup>2</sup> Jae Kyun Lee,<sup>4</sup> Jin Wook Cha,<sup>2</sup> Sunghoon Hwang,<sup>1</sup> Ki Young Choi,<sup>2</sup> Yoon-Jae Song,<sup>3</sup> Sang-Jip Nam,<sup>5</sup> Seung-II Nam,<sup>6</sup> Hak Cheol Kwon,<sup>2</sup> Jin-Soo Park<sup>\*,2</sup>, Dong-Chan Oh<sup>\*,1</sup>

<sup>1</sup>Natural Products Research Institute, College of Pharmacy, Seoul National University, 1 Gwanak-ro, Gwanak-gu, Seoul 08826, Republic of Korea

<sup>2</sup>Natural Product Informatics Research Center, Korea Institute of Science and Technology (KIST) Gangneung Institute, Gangneung 25451, Republic of Korea

<sup>3</sup>Department of Life Science, Gachon University, Seongnam-daero 1342 Sujeong-gu, Seongnam, 13120, Republic of Korea

<sup>4</sup>Neuro-Medicine, Korea Institute of Science and Technology, Hwarang-ro 14-gil 5, Seongbuk-gu, Seoul, 02792, Republic of Korea

<sup>5</sup>Department of Chemistry and Nanoscience, Ewha Womans University, Seoul 03760, Republic of Korea

<sup>6</sup>Division of Glacial Environment Research, Korea Polar Research Institute, Incheon 21990, Republic of Korea

\*J.-S. Park, Tel: +82-33-650-3509, Fax: +82-33-650-3629, E-mail: jinsoopark@kist.re.kr.

\*D.-C. Oh, Tel: +82-2-880-2492, Fax: +82-2-762-8322, E-mail: dongchanoh@snu.ac.kr.

# Table of Contents

S2-S4 : Table of Contents

S5 : **Figure S1.**  $^1\text{H}$  NMR spectrum (600 MHz) of glaciapyrrole D (**1**) in  $\text{MeOH-}d_4$ .

S5 : **Figure S2.**  $^{13}\text{C}$  NMR spectrum (150 MHz) of glaciapyrrole D (**1**) in  $\text{MeOH-}d_4$ .

S6 : **Figure S3.** COSY spectrum (600 MHz) of glaciapyrrole D (**1**) in  $\text{MeOH-}d_4$ .

S6 : **Figure S4.** ROESY spectrum (600 MHz) of glaciapyrrole D (**1**) in  $\text{MeOH-}d_4$ .

S7 : **Figure S5.** HSQC spectrum (600 MHz) of glaciapyrrole D (**1**) in  $\text{MeOH-}d_4$ .

S7 : **Figure S6.** HMBC spectrum (600 MHz) of glaciapyrrole D (**1**) in  $\text{MeOH-}d_4$ .

S8 : **Figure S7.**  $^1\text{H}$  NMR spectrum (600 MHz) of glaciapyrrole E (**2**) in  $\text{MeOH-}d_4$ .

S8 : **Figure S8.**  $^{13}\text{C}$  NMR spectrum (150 MHz) of glaciapyrrole E (**2**) in  $\text{MeOH-}d_4$ .

S9 : **Figure S9.** COSY spectrum (600 MHz) of glaciapyrrole E (**2**) in  $\text{MeOH-}d_4$ .

S9 : **Figure S10.** ROESY spectrum (600 MHz) of glaciapyrrole E (**2**) in  $\text{MeOH-}d_4$ .

S10 : **Figure S11.** HSQC spectrum (600 MHz) of glaciapyrrole E (**2**) in  $\text{MeOH-}d_4$ .

S10 : **Figure S12.** HMBC spectrum (600 MHz) of glaciapyrrole E (**2**) in  $\text{MeOH-}d_4$ .

S11 : **Figure S13.**  $^1\text{H}$  NMR spectrum (850 MHz) of photoglaciapyrrole D (**4**) in  $\text{MeOH-}d_4$ .

S11 : **Figure S14.**  $^{13}\text{C}$  NMR spectrum (212.5 MHz) of photoglaciapyrrole D (**4**) in  $\text{MeOH-}d_4$ .

S12 : **Figure S15.** COSY spectrum (850 MHz) of photoglaciapyrrole D (**4**) in  $\text{MeOH-}d_4$ .

S12 : **Figure S16.** ROESY spectrum (850 MHz) of photoglaciapyrrole D (**4**) in  $\text{MeOH-}d_4$ .

S13 : **Figure S17.** HSQC spectrum (850 MHz) of photoglaciapyrrole D (**4**) in  $\text{MeOH-}d_4$ .

S13 : **Figure S18.** HMBC spectrum (850 MHz) of photoglaciapyrrole D (**4**) in  $\text{MeOH-}d_4$ .

S14 : **Figure S19.**  $^1\text{H}$  NMR spectrum (850 MHz) of photoglaciapyrrole E (**5**) in  $\text{MeOH-}d_4$ .

S14 : **Figure S20.**  $^{13}\text{C}$  NMR spectrum (212.5 MHz) of photoglaciapyrrole E (**5**) in  $\text{MeOH-}d_4$ .

S15 : **Figure S21.** COSY spectrum (850 MHz) of photoglaciapyrrole E (**5**) in  $\text{MeOH-}d_4$ .

S15 : **Figure S22.** ROESY spectrum (850 MHz) of photoglaciapyrrole E (**5**) in  $\text{MeOH-}d_4$ .

S16 : **Figure S23.** HSQC spectrum (850 MHz) of photoglaciapyrrole E (**5**) in  $\text{MeOH-}d_4$ .

S16 : **Figure S24.** HBMC spectrum (850 MHz) of photoglaciapyrrole E (**5**) in  $\text{MeOH-}d_4$ .

S17 : **Figure S25.**  $^1\text{H}$  NMR spectrum (850 MHz) of photoglaciapyrrole A (**6**) in  $\text{MeOH-}d_4$ .

S17 : **Figure S26.**  $^{13}\text{C}$  NMR spectrum (212.5 MHz) of photoglaciapyrrole A (**6**) in  $\text{MeOH-}d_4$ .

S18 : **Figure S27.** COSY spectrum (850 MHz) of photoglaciapyrrole A (**6**) in  $\text{MeOH-}d_4$ .

S18 : **Figure S28.** ROESY spectrum (850 MHz) of photoglaciapyrrole A (**6**) in  $\text{MeOH-}d_4$ .

S19 : **Figure S29.** HSQC spectrum (850 MHz) of photoglaciapyrrole A (**6**) in  $\text{MeOH-}d_4$ .

S19 : **Figure S30.** HMBC spectrum (850 MHz) of photoglaciapyrrole A (**6**) in  $\text{MeOH-}d_4$ .

S20 : **Figure S31.**  $^1\text{H}$  NMR spectrum (500 MHz) of glaciapyrrole A (**3**) in  $\text{MeOH-}d_4$ .

S20: **Figure S32.**  $^1\text{H}$  NMR spectrum (500 MHz) of *S*-MTPA ester (**7**) for glaciapyrrole E (**2**) in  $\text{MeOH-}d_4$ .

S21 : **Figure S33.** COSY spectrum (500 MHz) of *S*-MTPA ester (**7**) for glaciapyrrole E (**2**) in  $\text{MeOH-}d_4$ .

S21 : **Figure S34.**  $^1\text{H}$  NMR spectrum (500 MHz) of *R*-MTPA ester (**8**) for glaciapyrrole E (**2**) in  $\text{MeOH-}d_4$ .

S22 : **Figure S35.** COSY spectrum (500 MHz) of *R*-MTPA ester (**8**) for glaciapyrrole E (**2**) in  $\text{MeOH-}d_4$ .

S22 : **Figure S36.** HR-FAB-MS data of glaciapyrrole D (**1**)

S23 : **Figure S37.** HR-FAB-MS data of glaciapyrrole E (**2**)

S23 : **Figure S38.** HR-FAB-MS data of photoglaciapyrrole D (**4**)

S24 : **Figure S39.** HR-FAB-MS data of photoglaciapyrrole E (**5**)

S24 : **Figure S40.** HR-FAB-MS data of photoglaciapyrrole A (**6**)

S25 : **Figure S41.** Comparison of the experimental and calculated ECD spectra of glaciapyrrole D (**1**).

S25 : **Figure S42.**  $^1\text{H}$  NMR signal intensity plot of photoglaciapyrrole A and glaciapyrrole A according to UV (366 nm) irradiation time when purified photoglaciapyrrole was irradiated. Each point is an integration value (an arbitrary unit) of  $^1\text{H}$  NMR signals at H-9 position of corresponding compounds.

S26 : **Figure S43.** A proposed reversible mechanism for the double bond photoisomerism.

S26 : **Table S1.** Cartesian coordinates of glaciapyrrole D (**1**)

S27 : **Table S2.** Cartesian coordinates of *ent*-glaciapyrrole D (**1**)

S28-30 : **Table S3.** ECD calculations of glaciapyrrole D (**1**)

**Figure S1.**  $^1\text{H}$  NMR spectrum (600 MHz) of glaciapyrrole D (**1**) in  $\text{MeOH-}d_4$ .

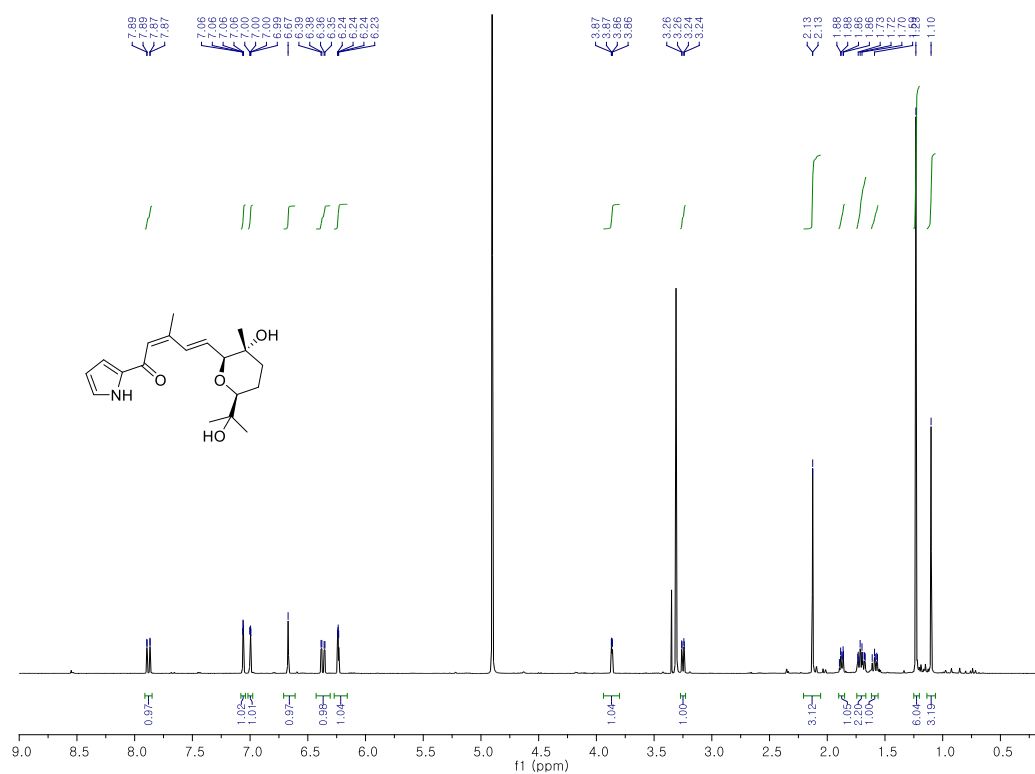

**Figure S2.**  $^{13}\text{C}$  NMR spectrum (125 MHz) of glaciapyrrole D (**1**) in  $\text{MeOH-}d_4$ .

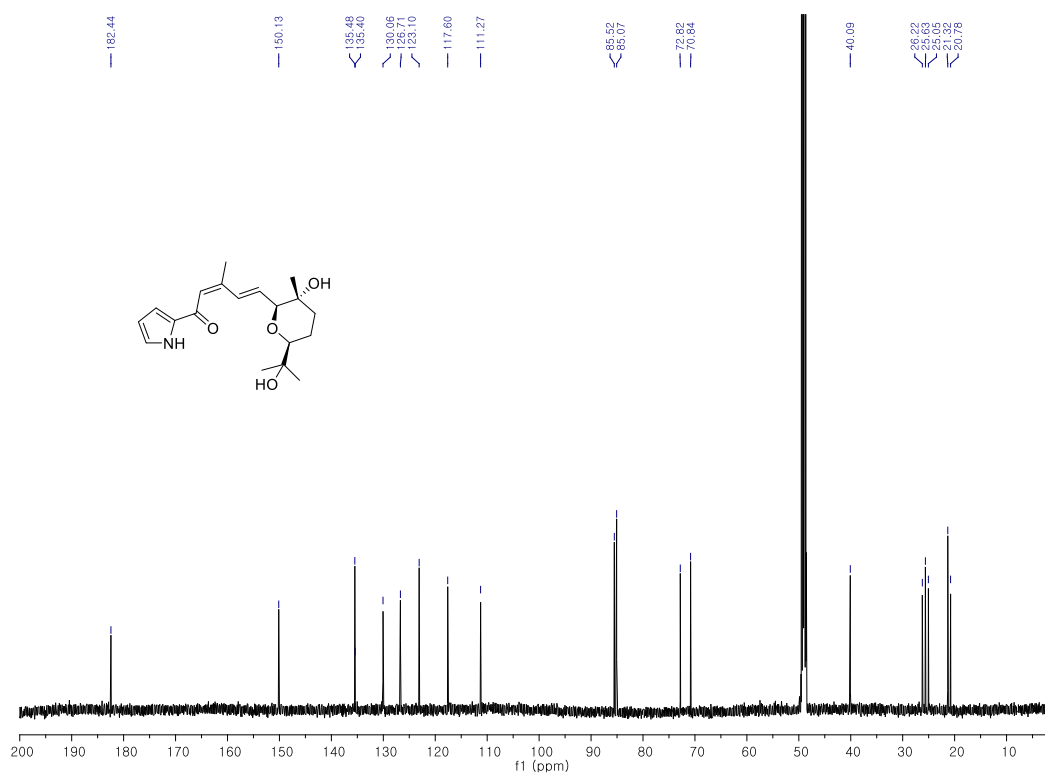

**Figure S3.** COSY spectrum (600 MHz) of glaciapyrrole D (**1**) in MeOH-*d*<sub>4</sub>.

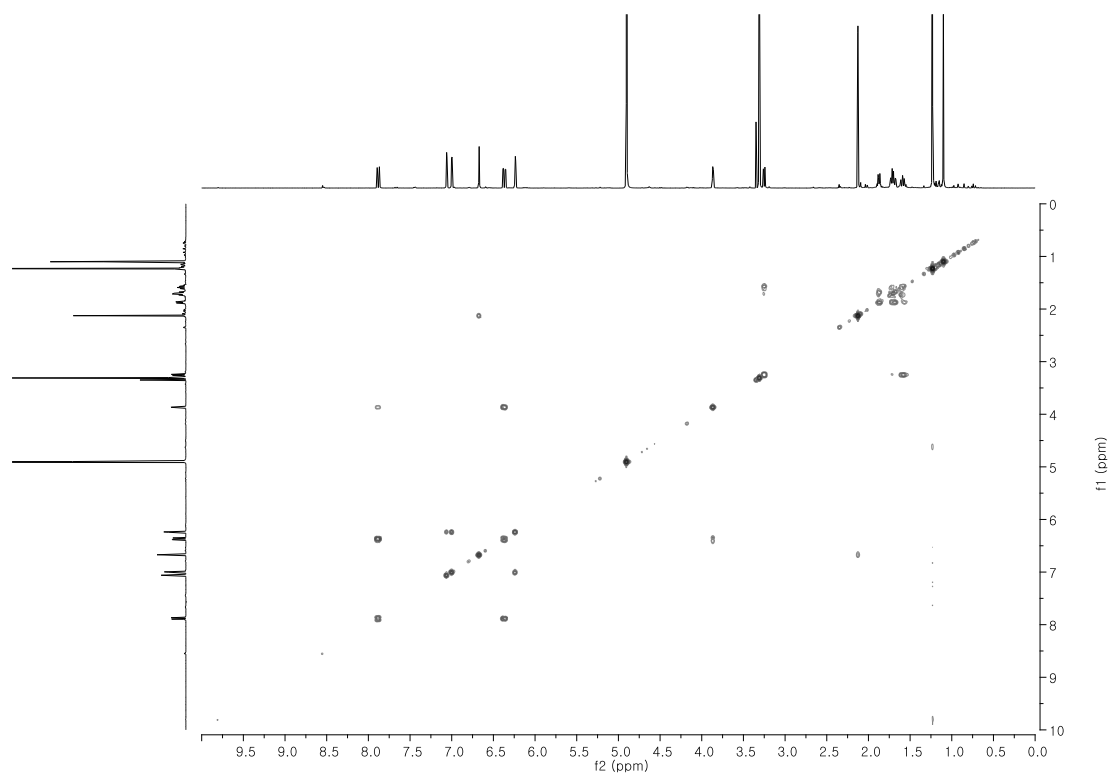

**Figure S4.** ROSEY spectrum (600 MHz) of glaciapyrrole D (**1**) in MeOH-*d*<sub>4</sub>.

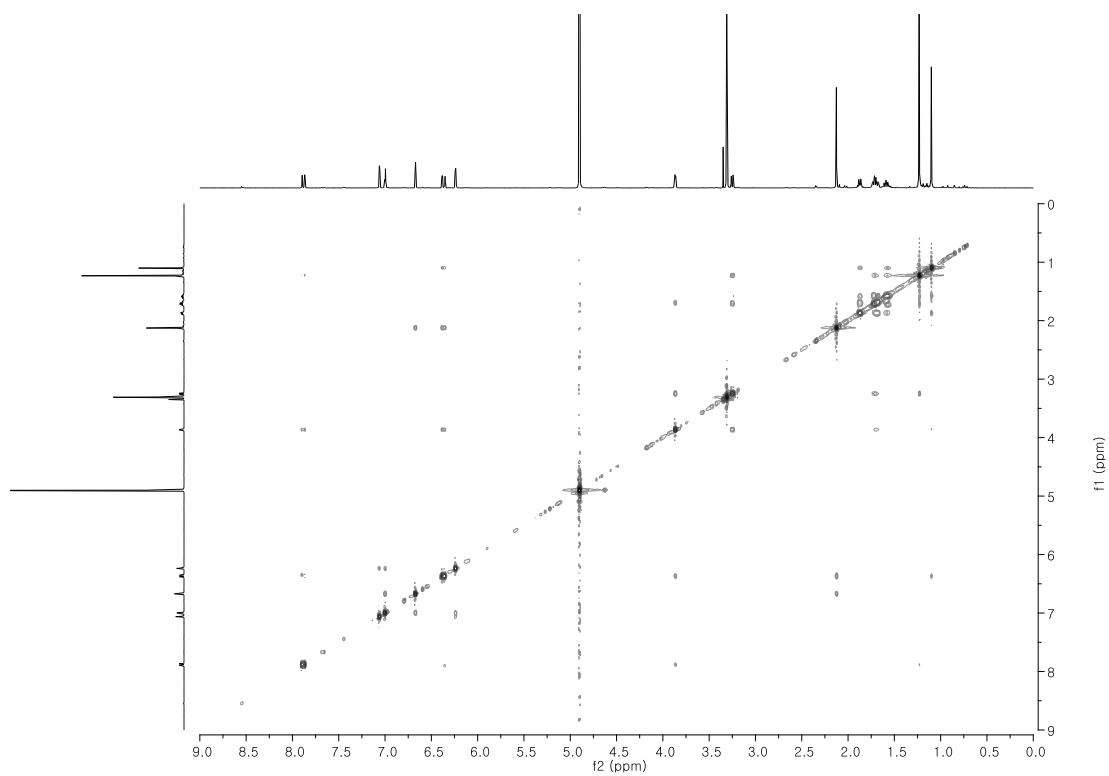

**Figure S5.** HSQC spectrum (600 MHz) of glaciapyrrole D (**1**) in MeOH-*d*<sub>4</sub>.

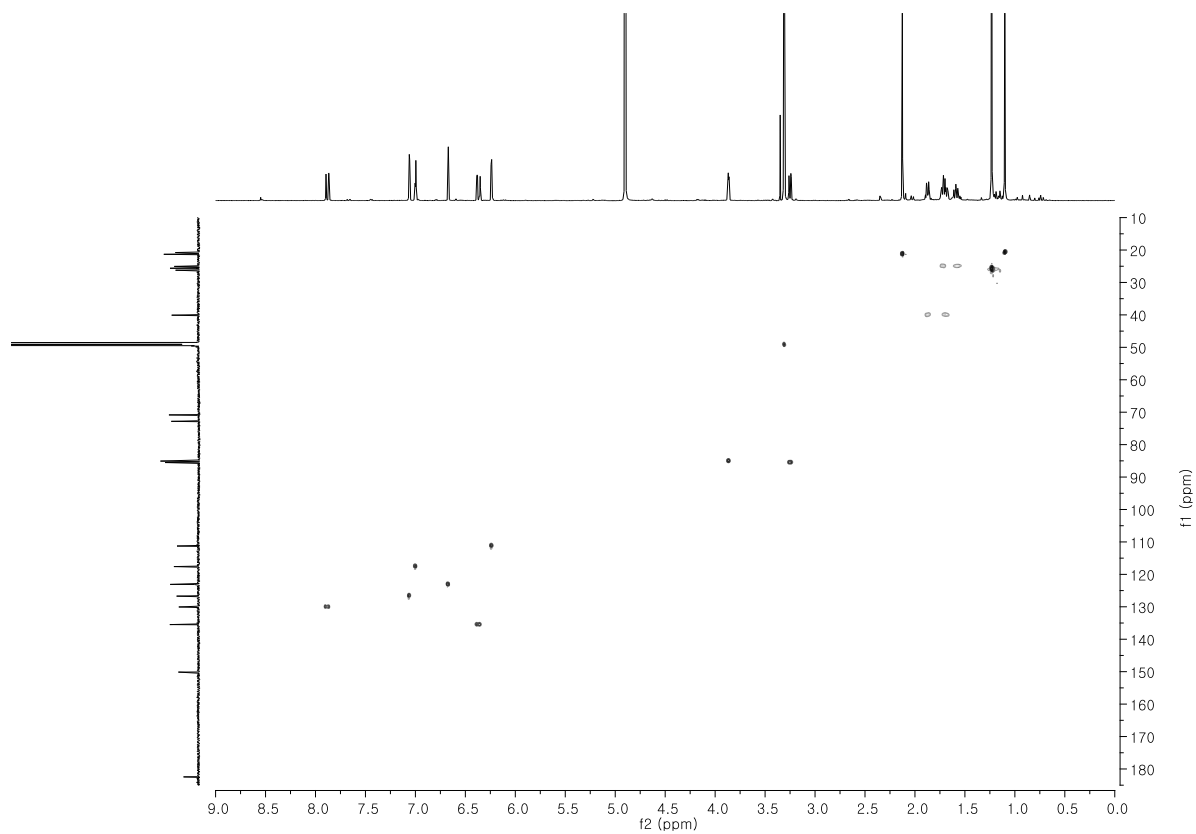

**Figure S6.** HMBC spectrum (600 MHz) of glaciapyrrole D (**1**) in MeOH-*d*<sub>4</sub>.

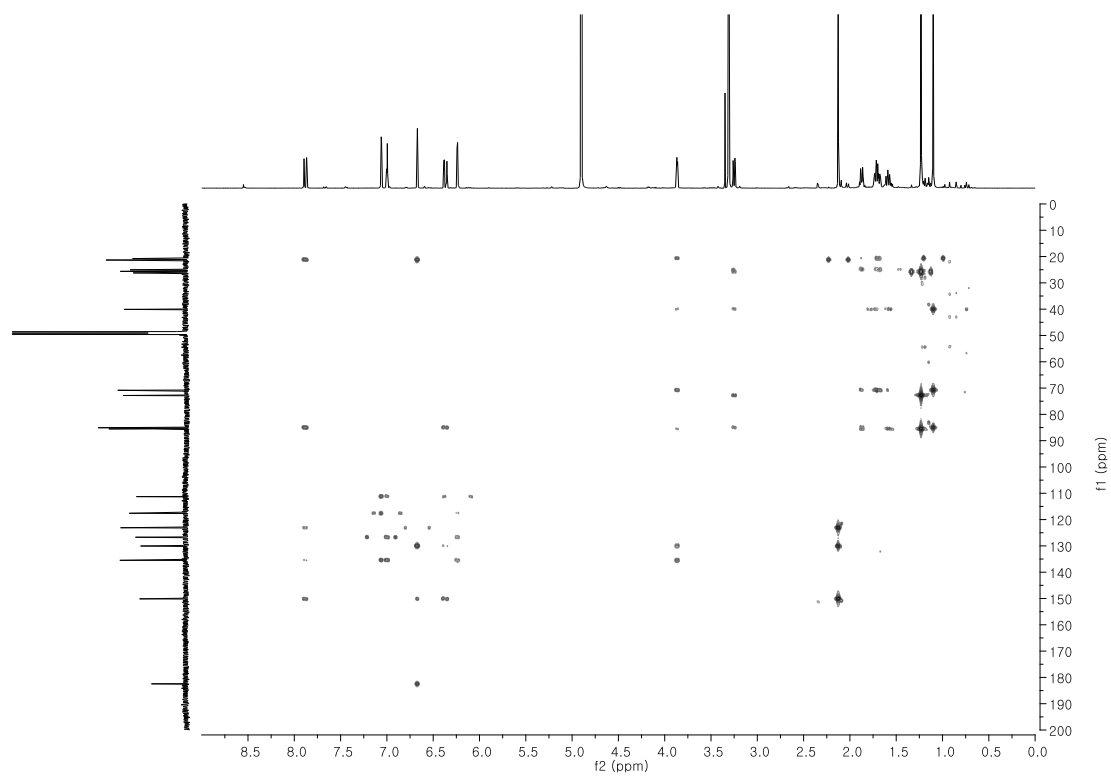

**Figure S7.**  $^1\text{H}$  NMR spectrum (600 MHz) of glaciapyrrole E (**2**) in  $\text{MeOH-}d_4$ .

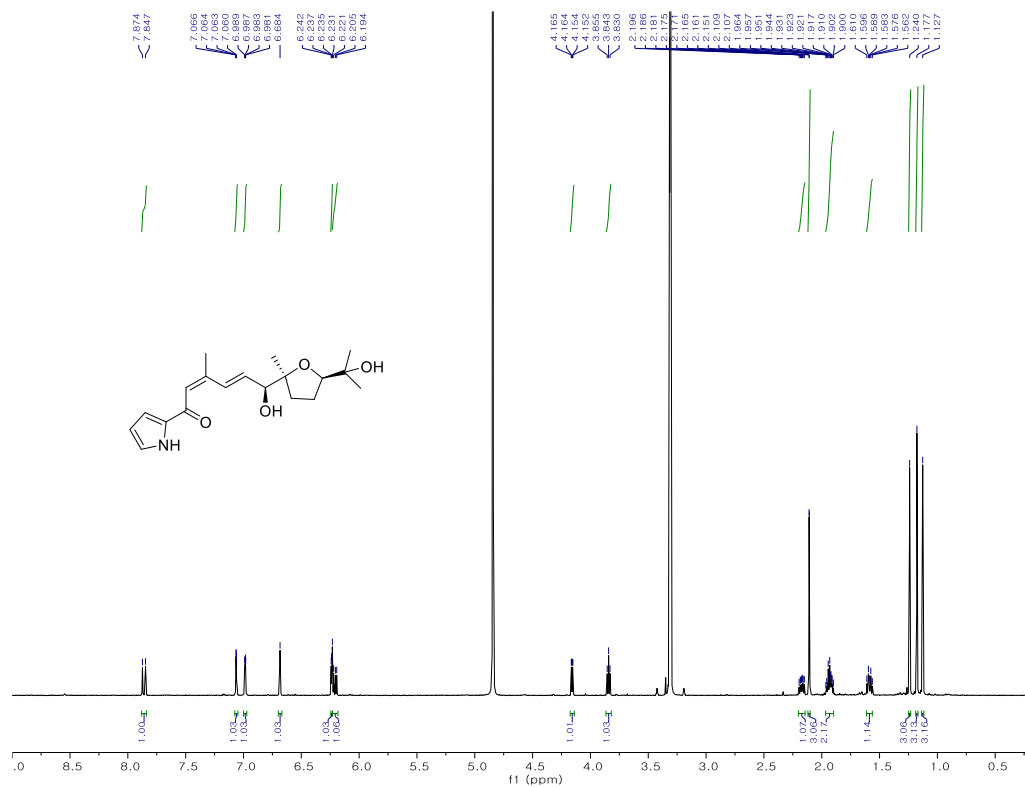

**Figure S8.**  $^{13}\text{C}$  NMR spectrum (125 MHz) of glaciapyrrole E (**2**) in  $\text{MeOH-}d_4$ .

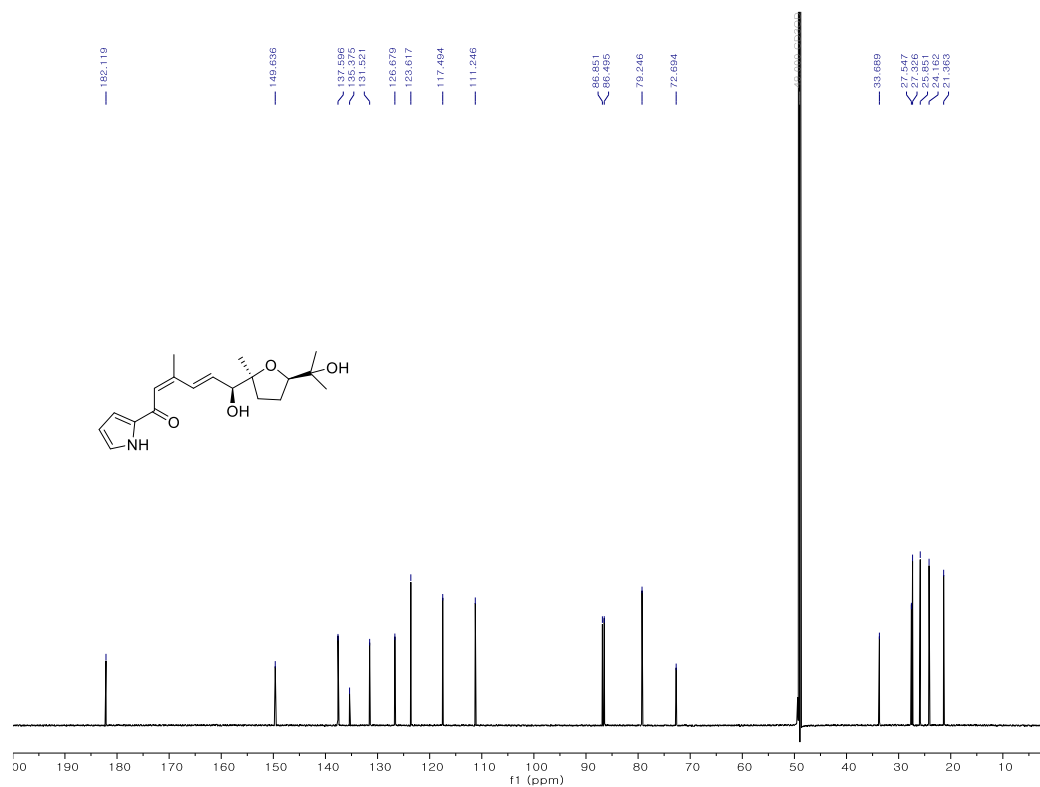



**Figure S9.** COSY spectrum (600 MHz) of glaciapyrrole E (**2**) in MeOH-*d*<sub>4</sub>.

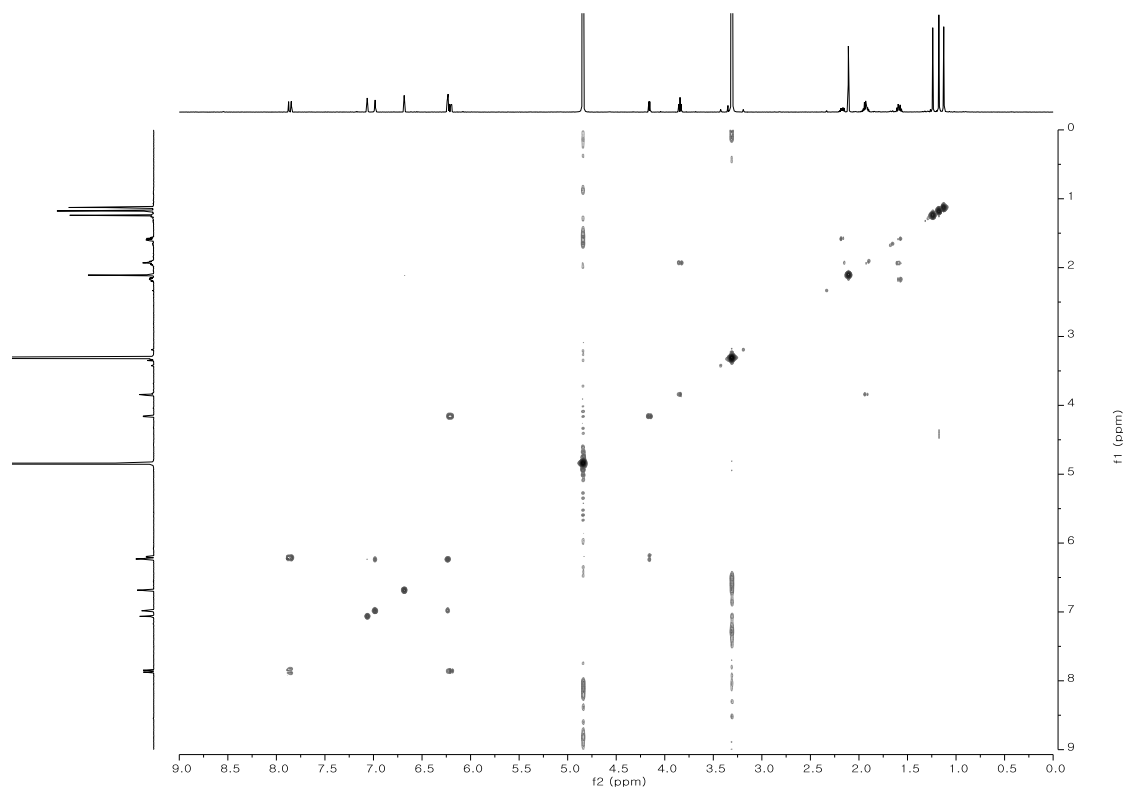

**Figure S10.** ROESY spectrum (600 MHz) of glaciapyrrole E (**2**) in MeOH-*d*<sub>4</sub>.

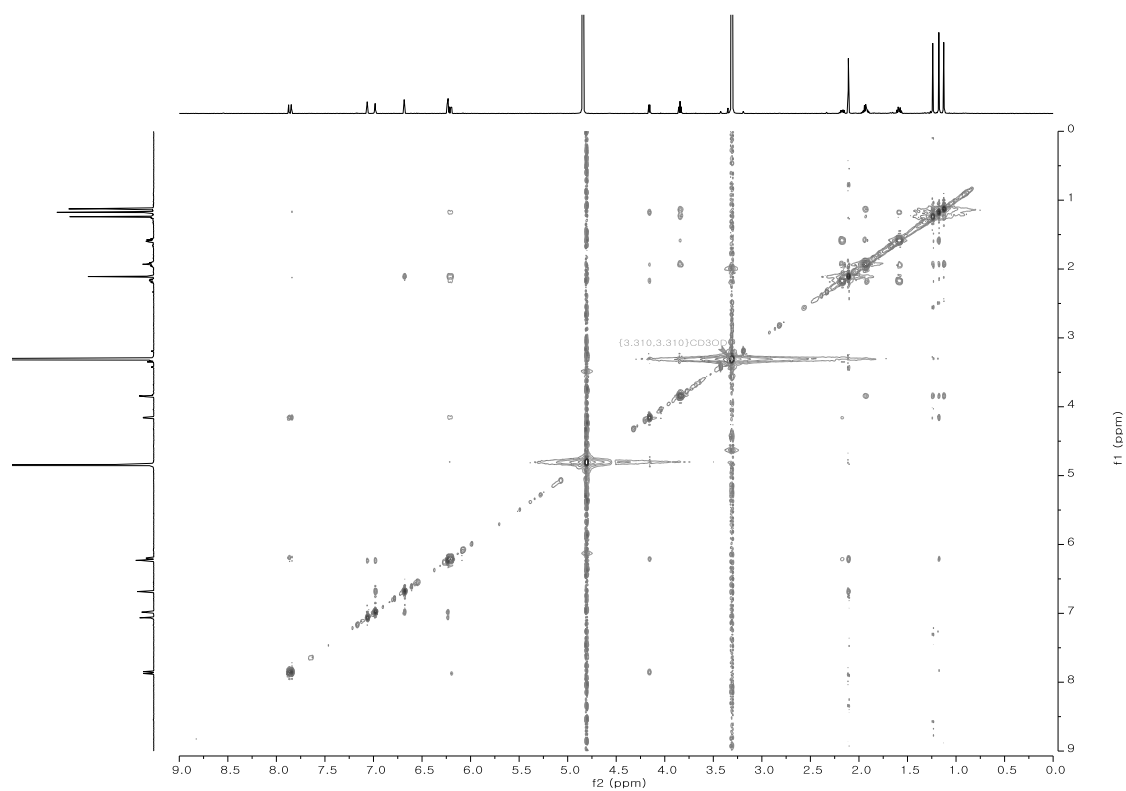

**Figure S11.** HSQC spectrum (600 MHz) of glaciapyrrole E (**2**) in MeOH-*d*<sub>4</sub>.

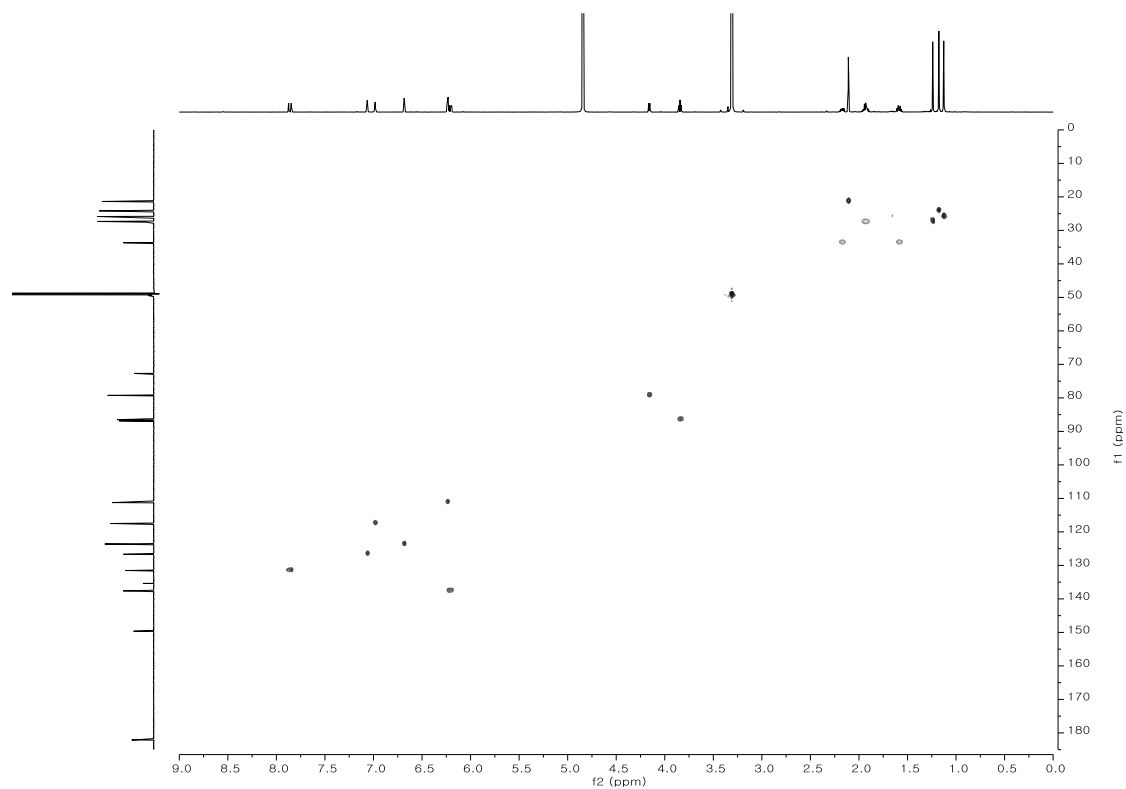

**Figure S12.** HMBC spectrum (600 MHz) of glaciapyrrole E (**2**) in MeOH-*d*<sub>4</sub>.

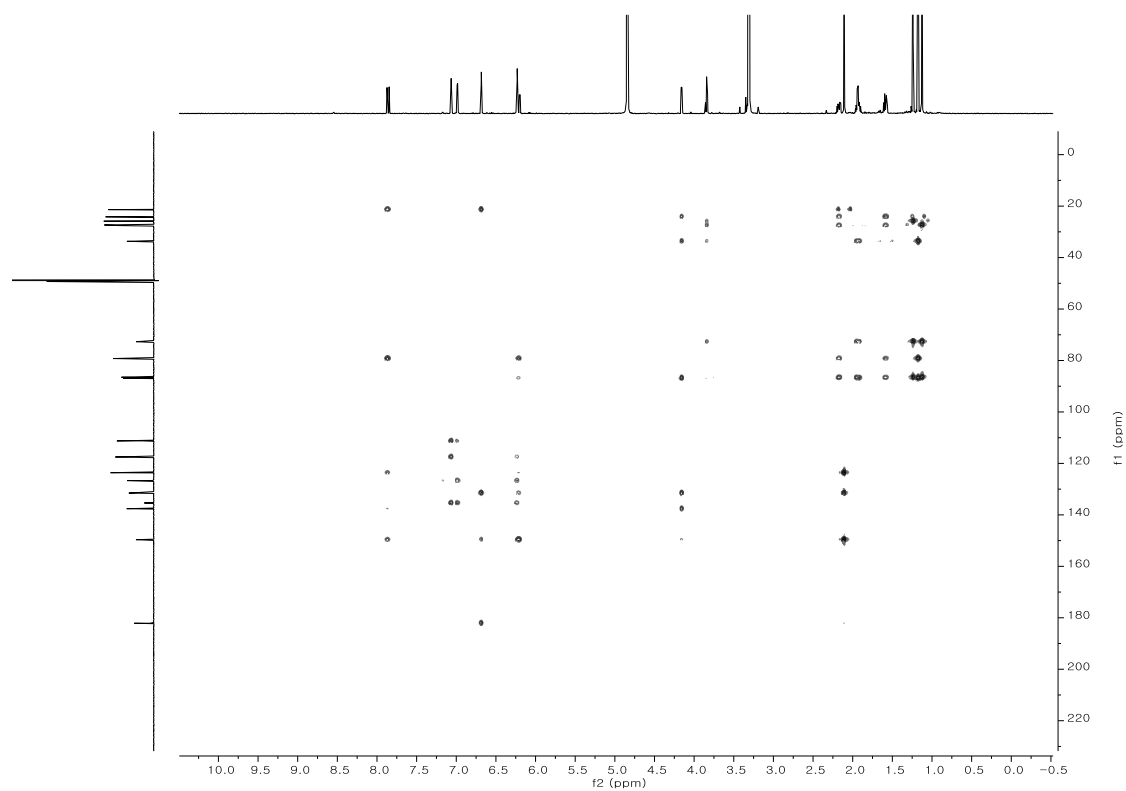

**Figure S13.**  $^1\text{H}$  NMR spectrum (850 MHz) of photoglaciapyrrole D (**4**) in  $\text{MeOH-}d_4$ .

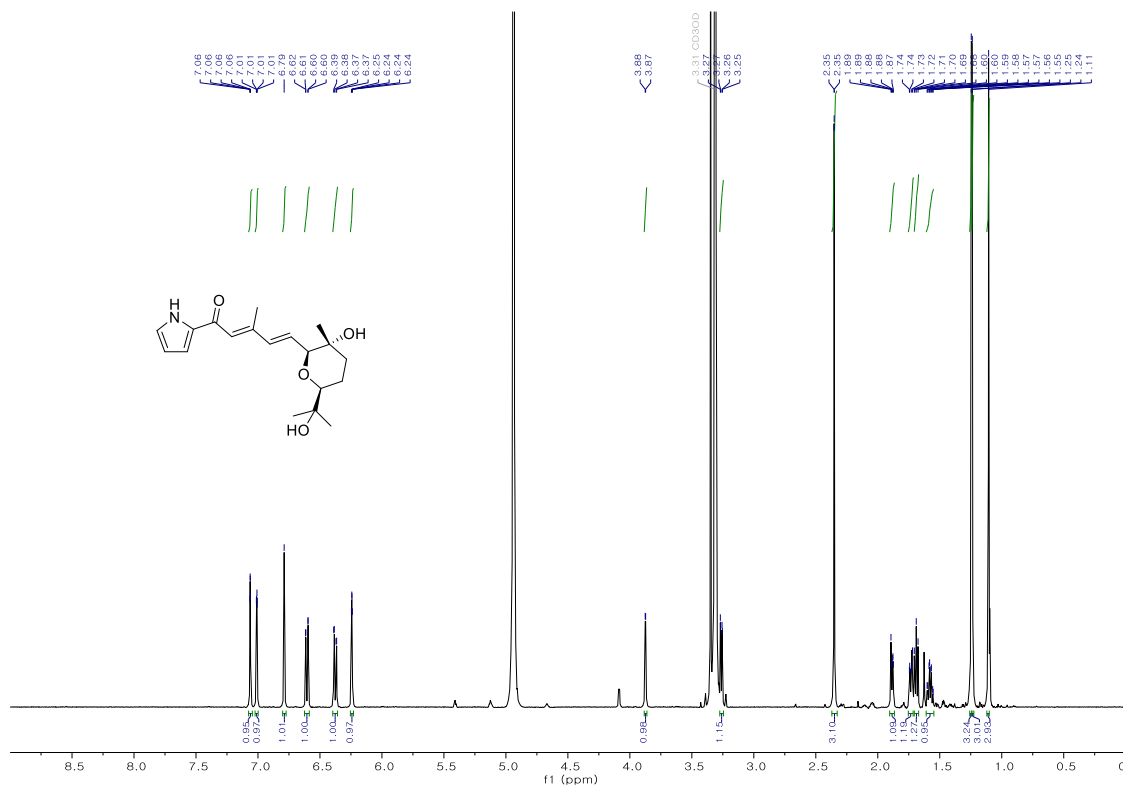

**Figure S14.**  $^{13}\text{C}$  NMR spectrum (212.5 MHz) of photoglaciapyrrole D (**4**) in  $\text{MeOH-}d_4$ .

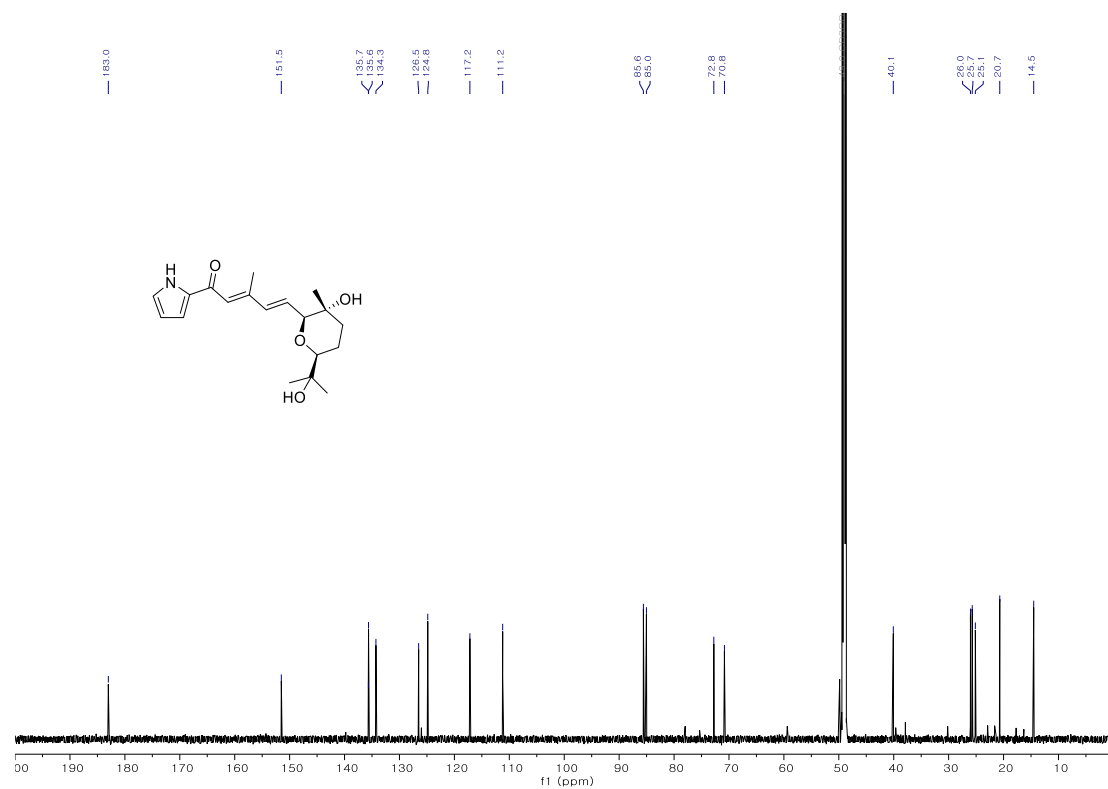

**Figure S15.** COSY spectrum (850 MHz) of photoglaciapyrrole D (**4**) in MeOH-*d*<sub>4</sub>.

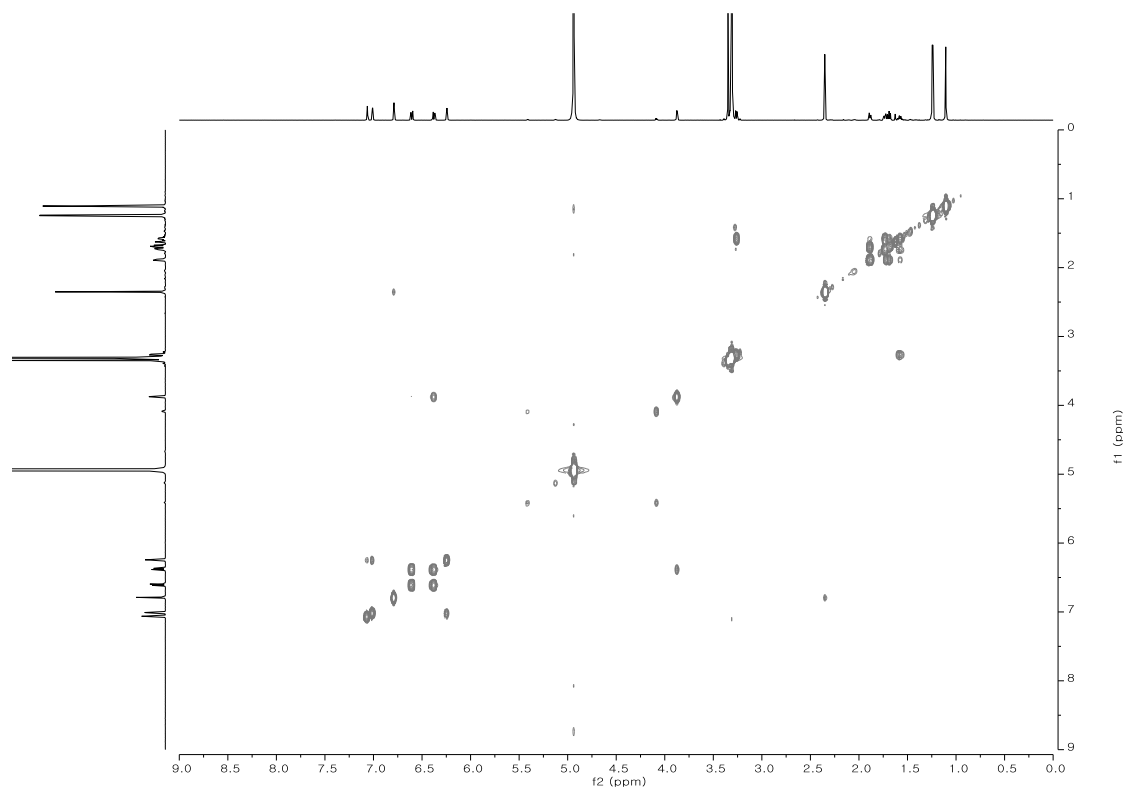

**Figure S16.** ROESY spectrum (850 MHz) of photoglaciapyrrole D (**4**) in MeOH-*d*<sub>4</sub>.

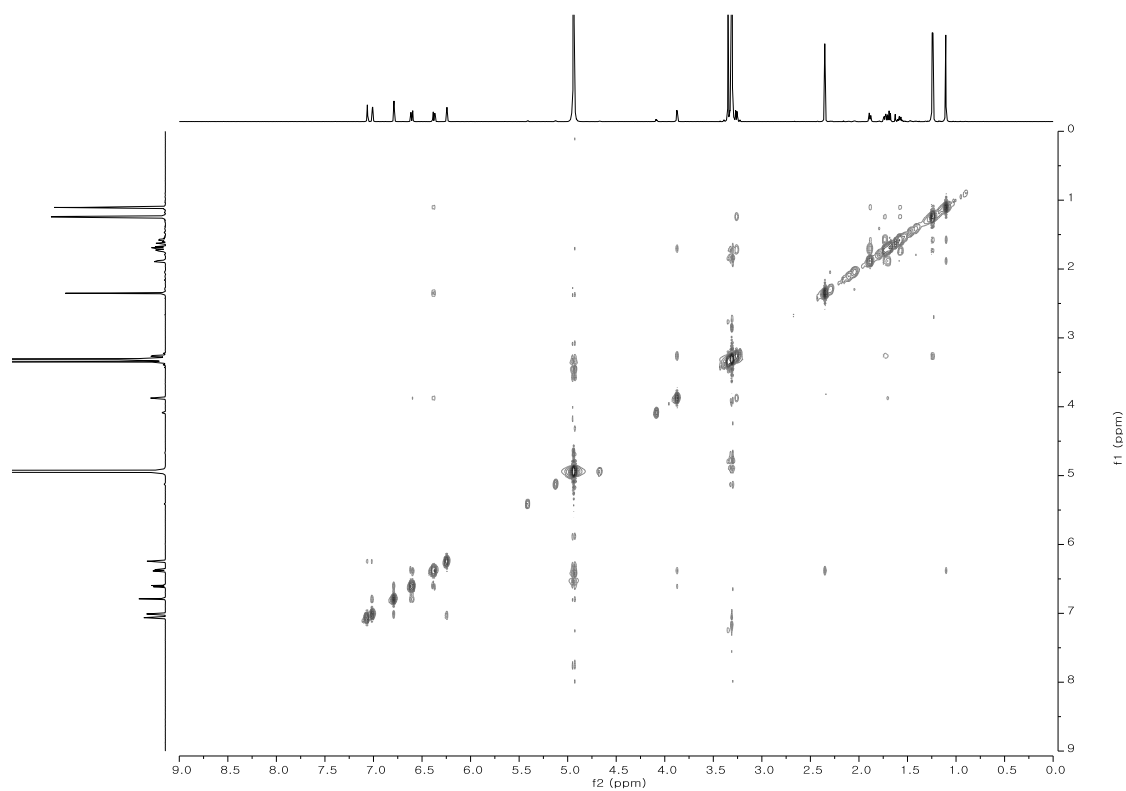

**Figure S17.** HSQC spectrum (850 MHz) of photoglaciapyrrole D (**4**) in MeOH-*d*<sub>4</sub>.

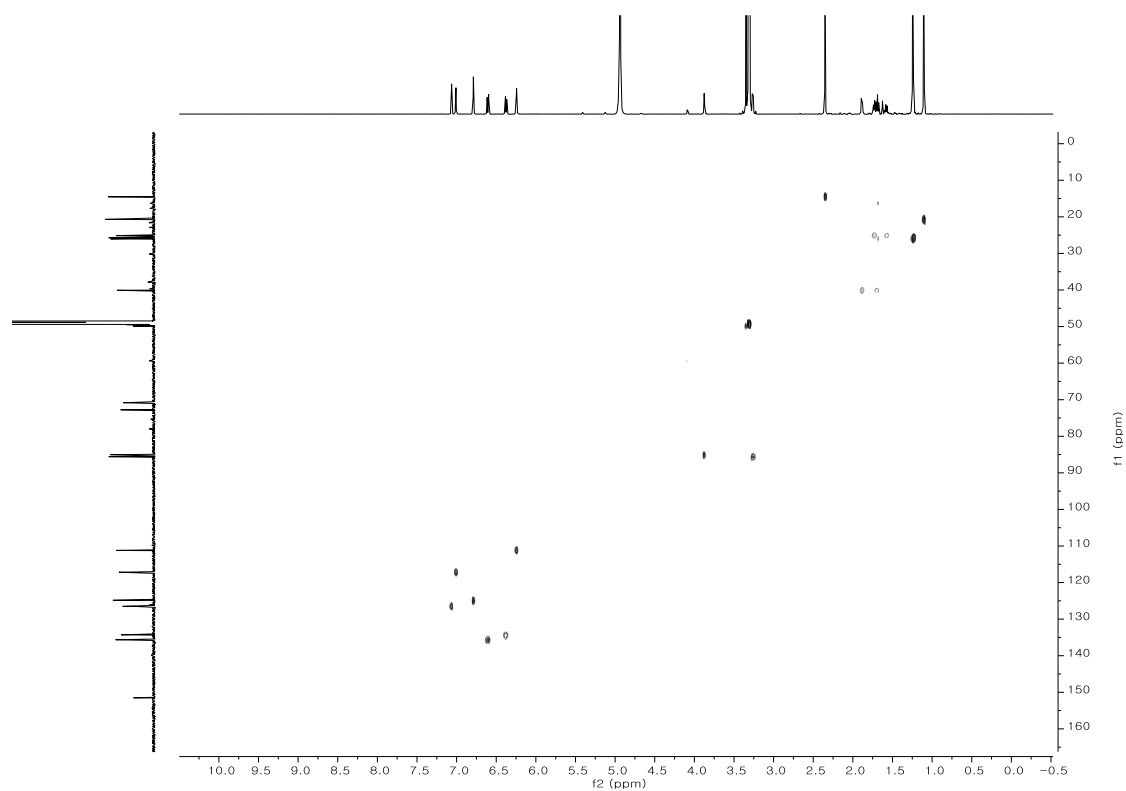

**Figure S18.** HMBC spectrum (850 MHz) of photoglaciapyrrole D (**4**) in MeOH-*d*<sub>4</sub>.

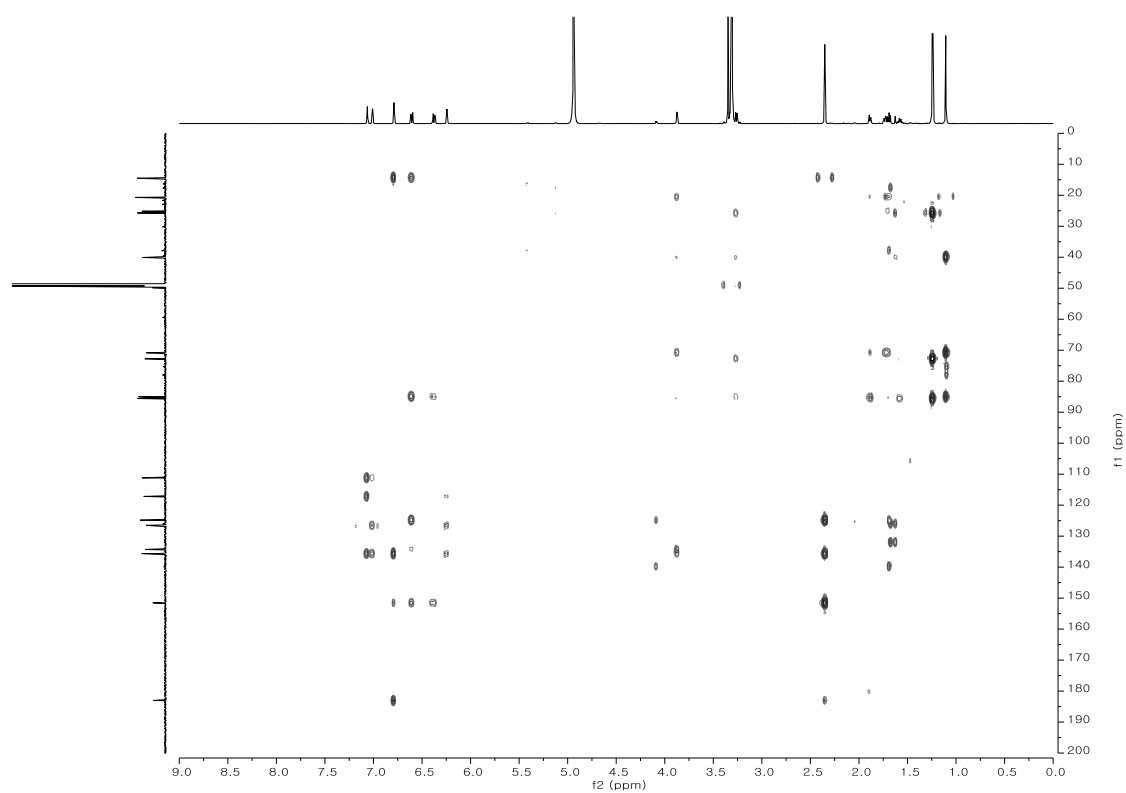

**Figure S19.**  $^1\text{H}$  NMR spectrum (850 MHz) of photoglaciapyrrole E (**5**) in  $\text{MeOH-}d_4$ .

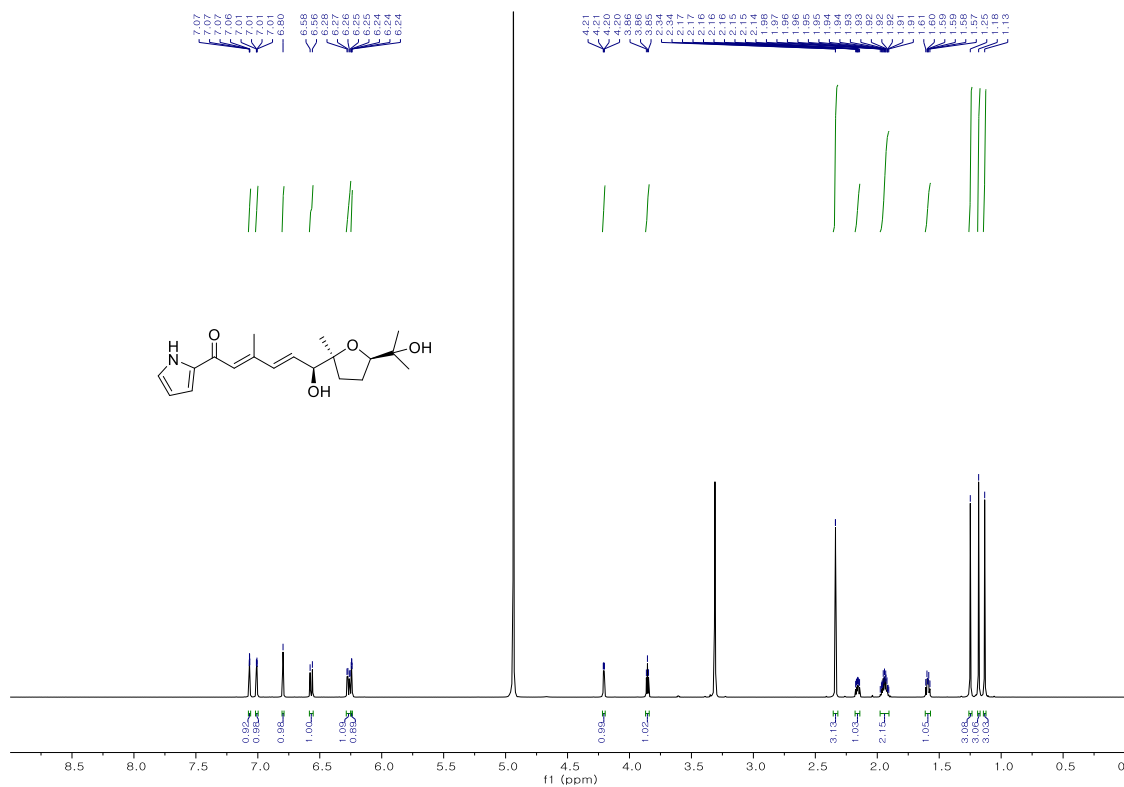

**Figure S20.**  $^{13}\text{C}$  NMR spectrum (212.5 MHz) of photoglaciapyrrole E (**5**) in  $\text{MeOH-}d_4$ .

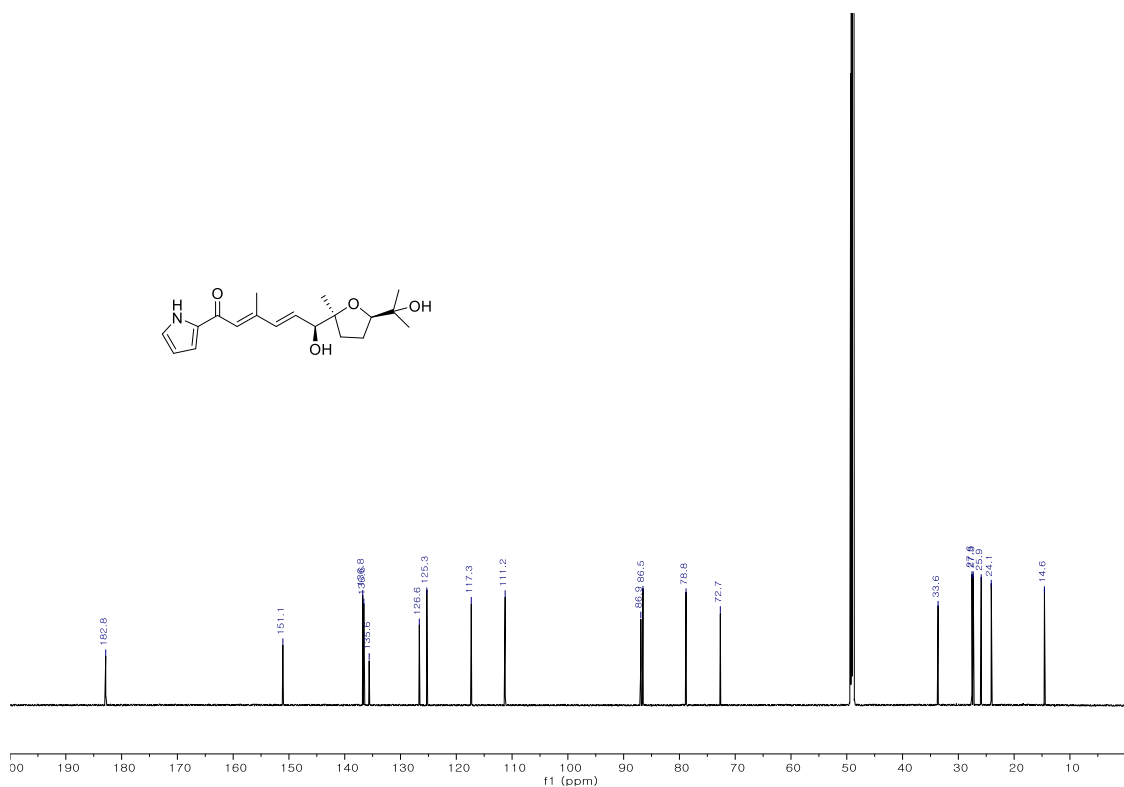

**Figure S21.** COSY spectrum (850 MHz) of photoglaciapyrrole E (**5**) in MeOH-*d*<sub>4</sub>.

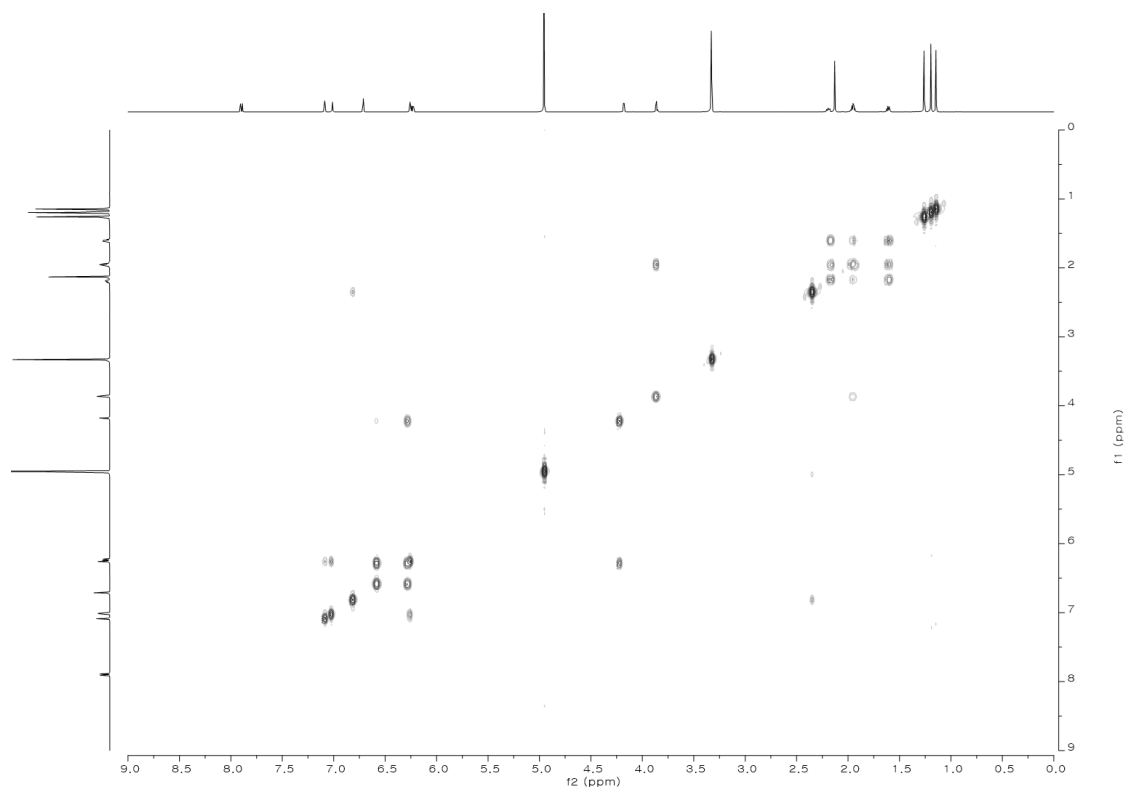

**Figure S22.** ROESY spectrum (850 MHz) of photoglaciapyrrole E (**5**) in MeOH-*d*<sub>4</sub>.

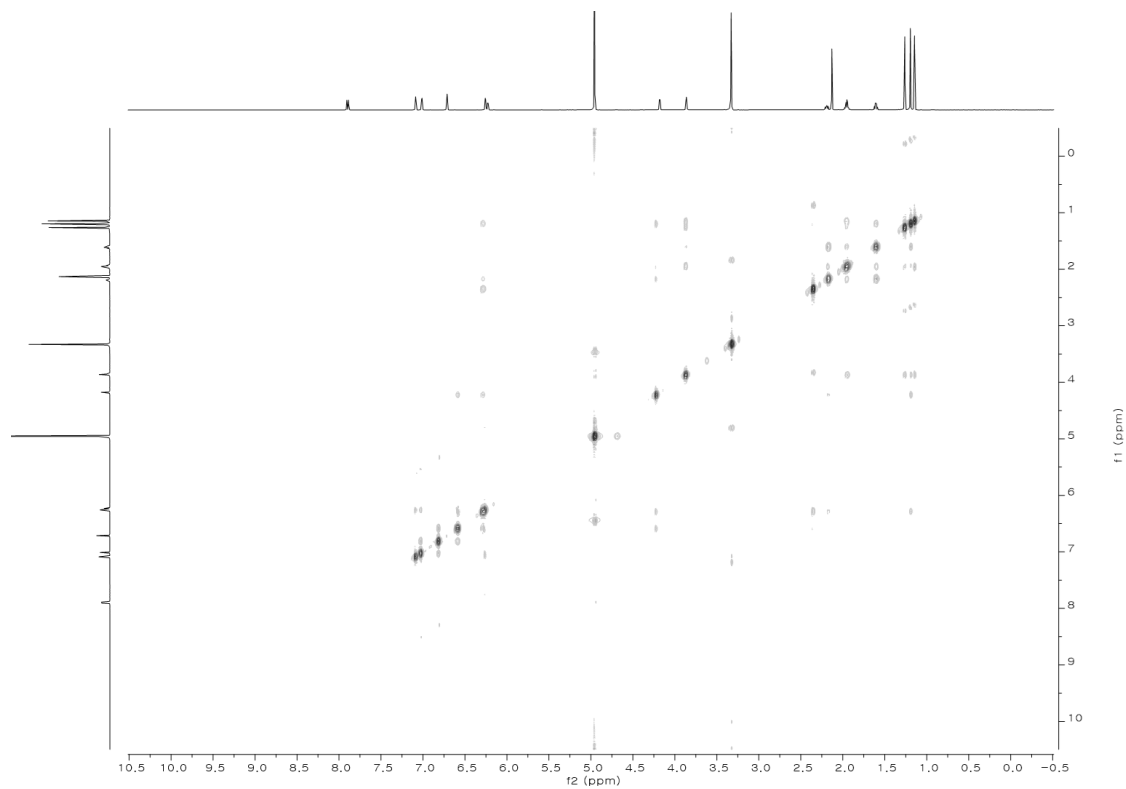

**Figure S23.** HSQC spectrum (850 MHz) of photoglaciapyrrole E (**5**) in MeOH-*d*<sub>4</sub>.

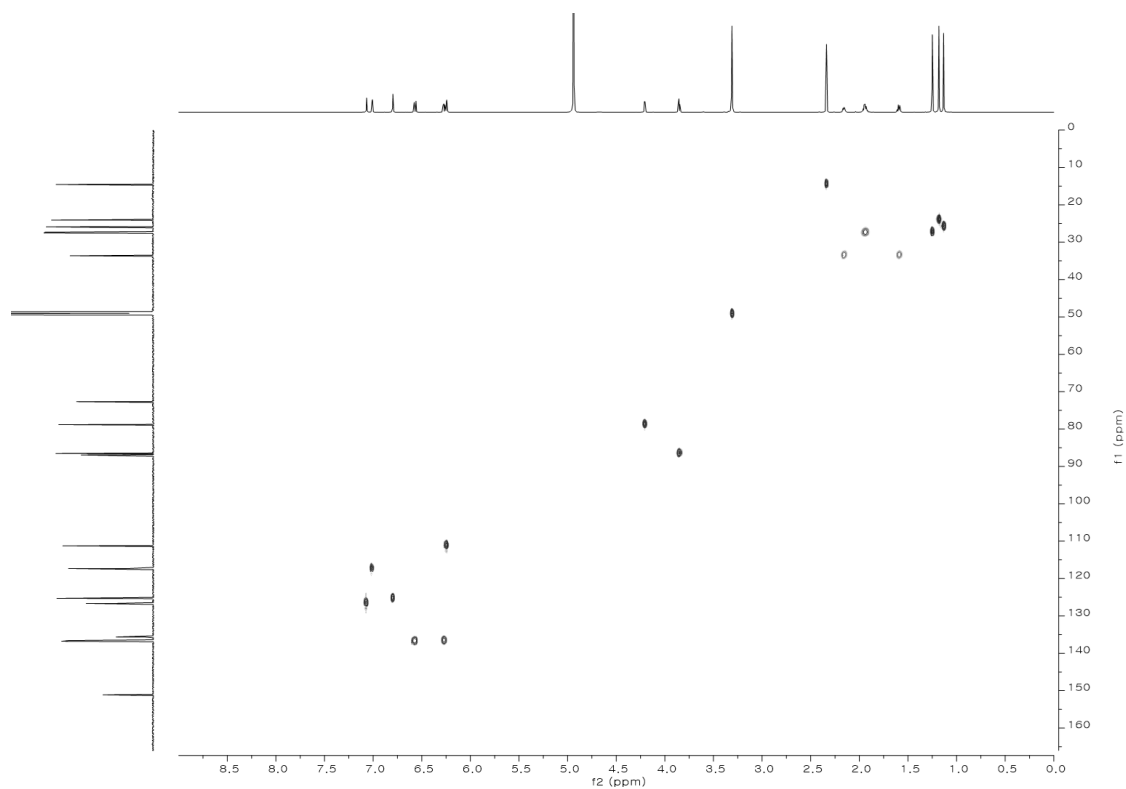

**Figure S24.** HMBC spectrum (850 MHz) of photoglaciapyrrole E (**5**) in MeOH-*d*<sub>4</sub>.

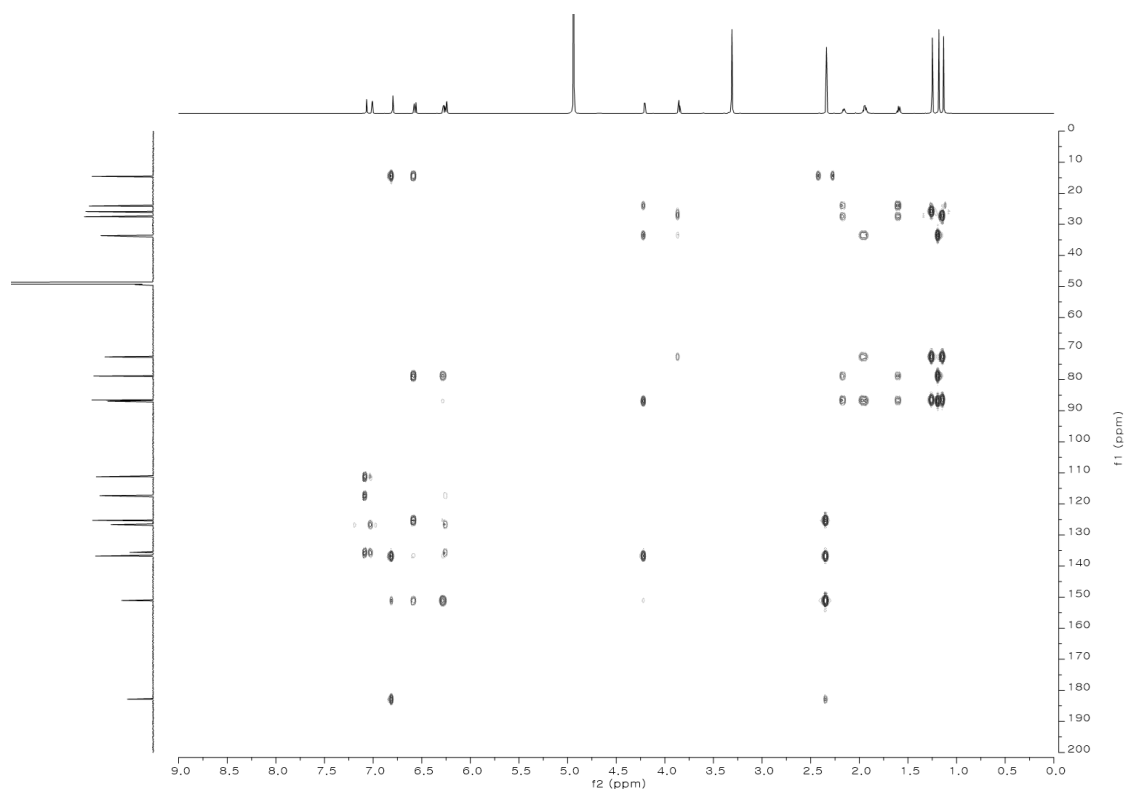



**Figure S25.**  $^1\text{H}$  NMR spectrum (850 MHz) of photoglaciapyrrole A (**6**) in  $\text{MeOH-}d_4$ .

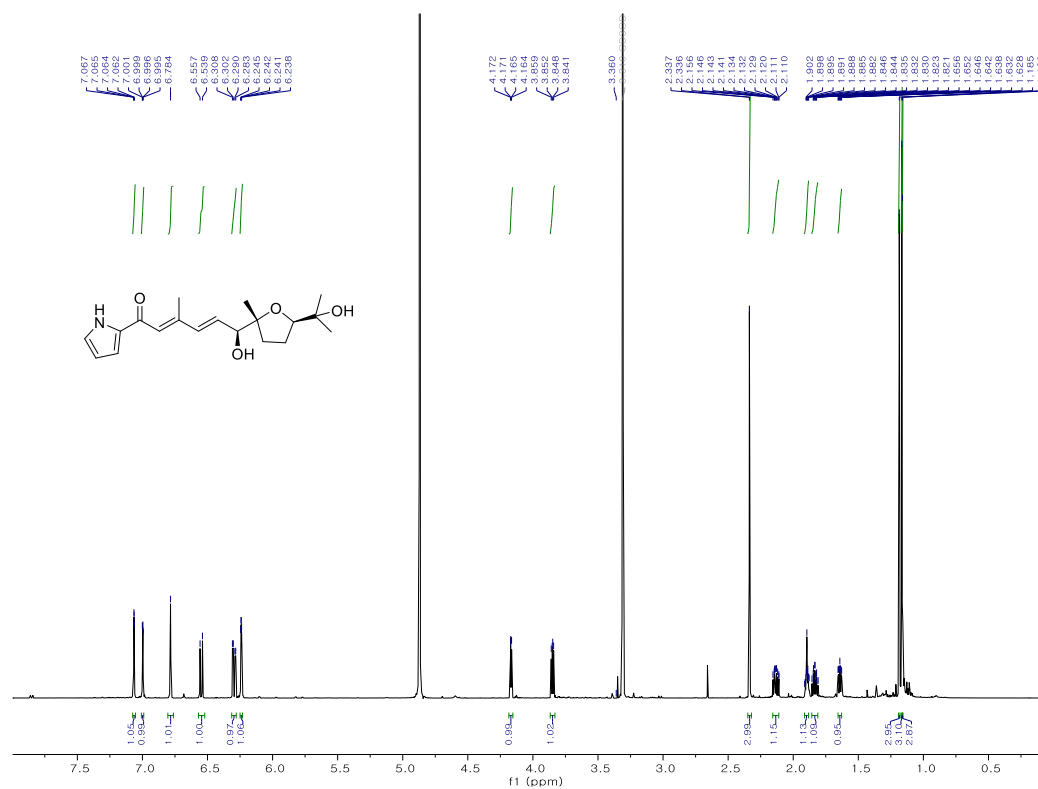

**Figure S26.**  $^{13}\text{C}$  NMR spectrum (212.5 MHz) of photoglaciapyrrole A (**6**) in  $\text{MeOH-}d_4$ .

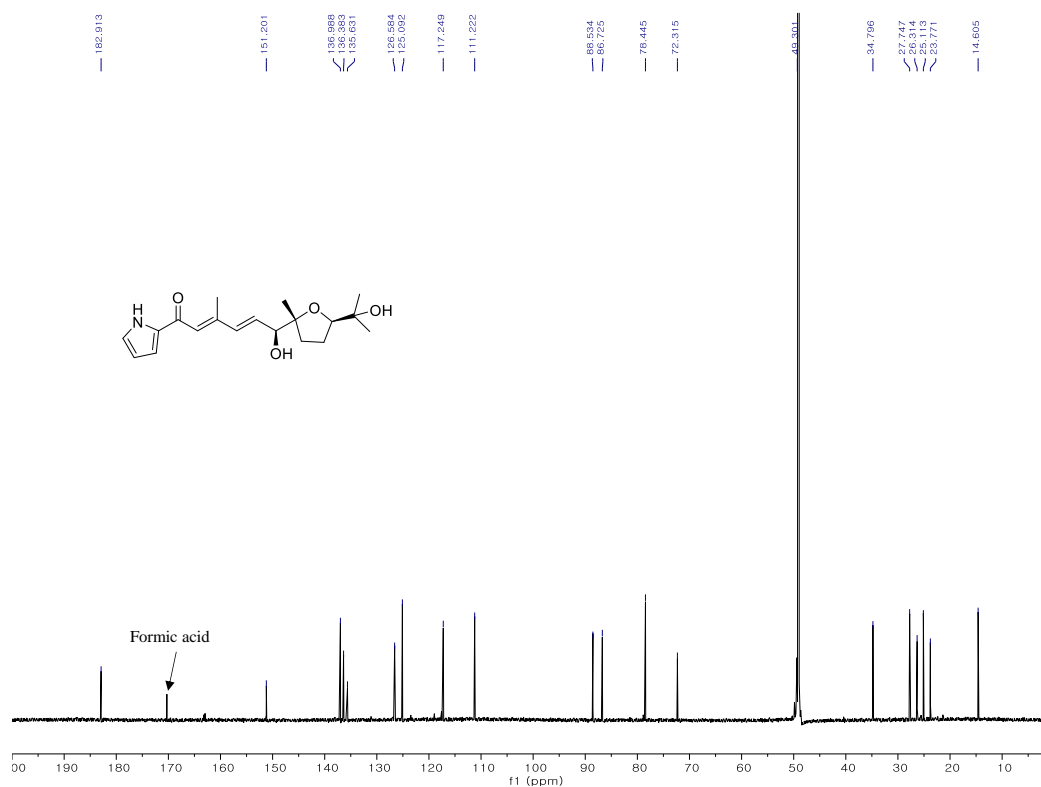

**Figure S27.** COSY spectrum (850 MHz) of photoglaciapyrrole A (**6**) in MeOH-*d*<sub>4</sub>.

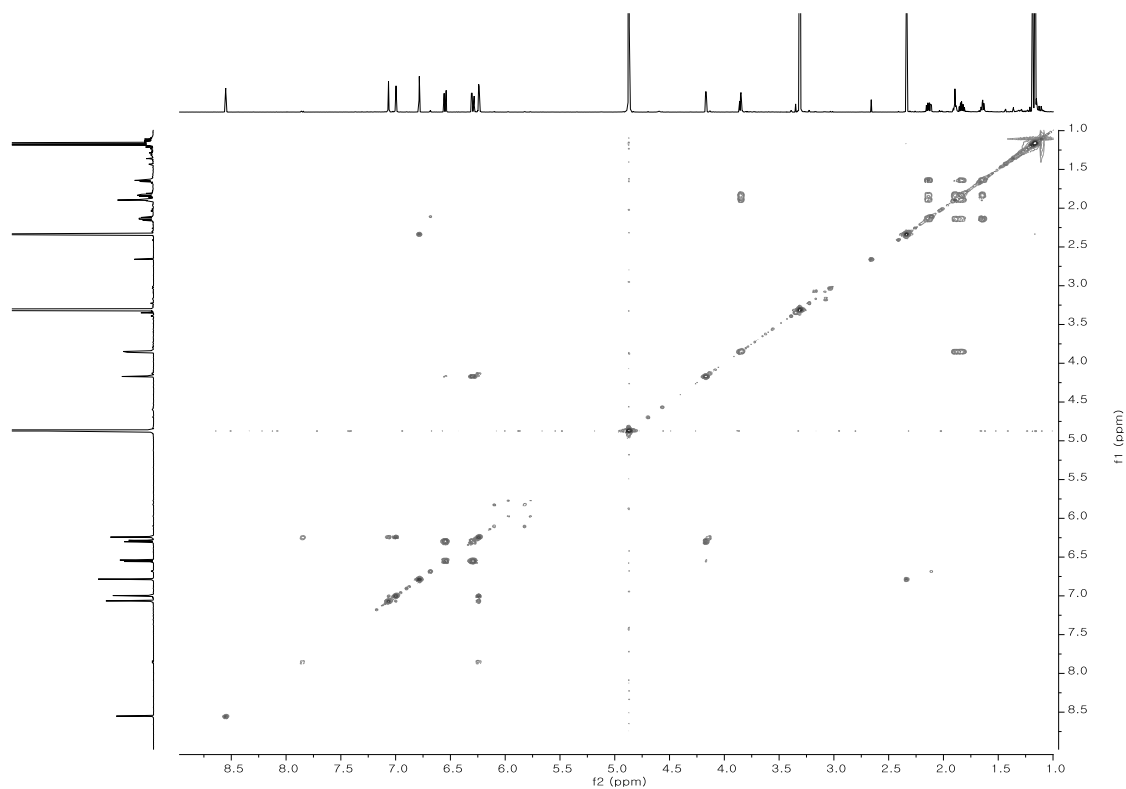

**Figure S28.** ROESY spectrum (850 MHz) of photoglaciapyrrole A (**6**) in MeOH-*d*<sub>4</sub>.

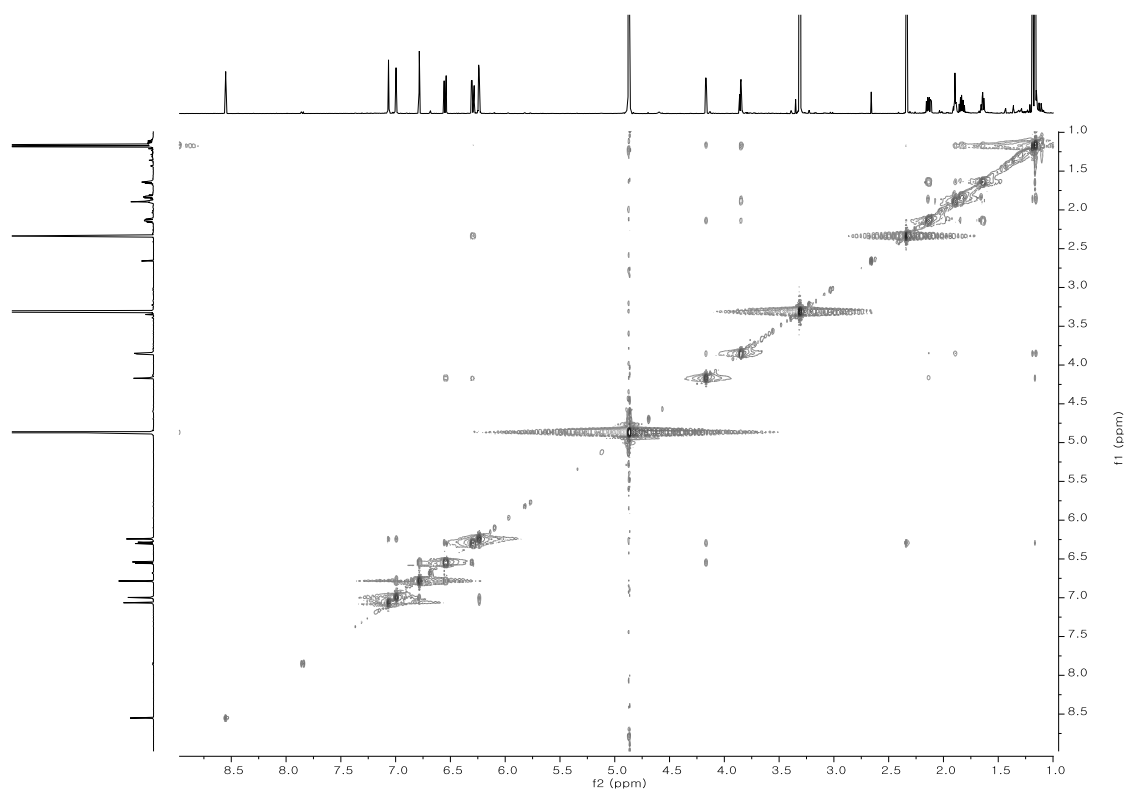

**Figure S29.** HSQC spectrum (850 MHz) of photoglaciapyrrole A (**6**) in MeOH-*d*<sub>4</sub>.

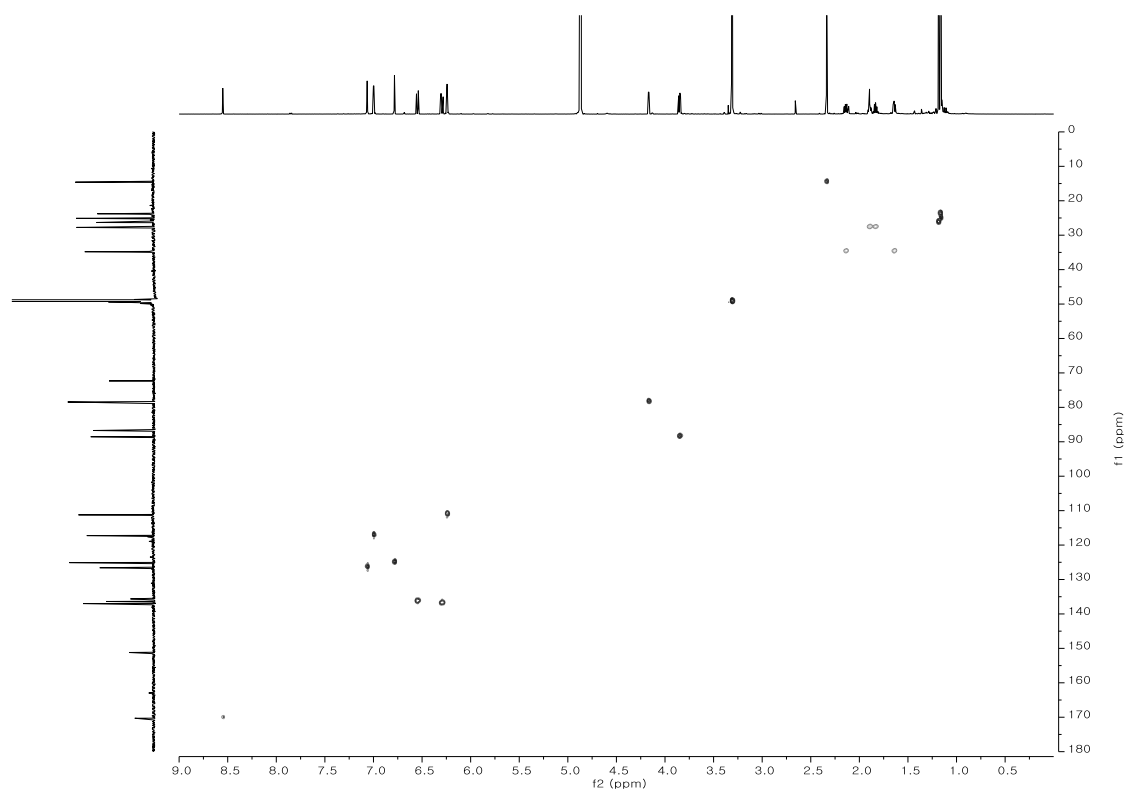

**Figure S30.** HMBC spectrum (850 MHz) of photoglaciapyrrole A (**6**) in MeOH-*d*<sub>4</sub>.

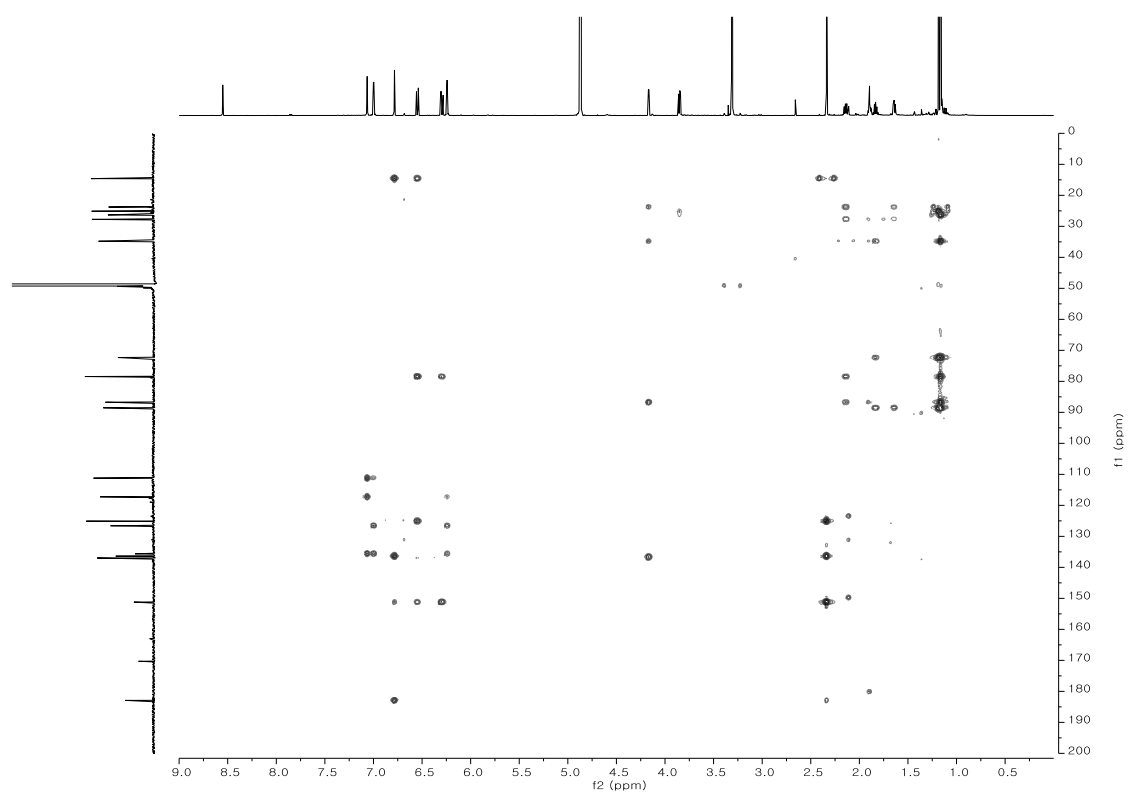

**Figure S31.**  $^1\text{H}$  NMR spectrum (600 MHz) of glaciapyrrole A (**3**) in  $\text{MeOH-}d_4$ .

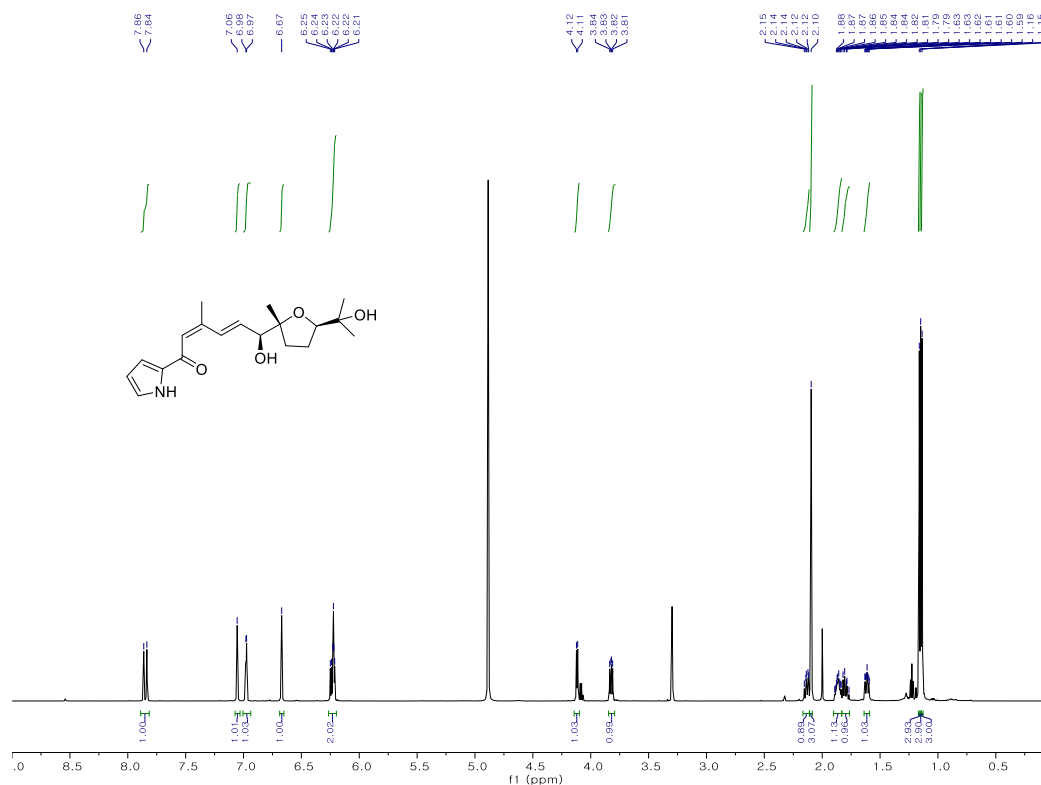

**Figure S32.**  $^1\text{H}$  NMR spectrum (500 MHz) of *S*-MTPA ester (**7**) for glaciapyrrole E (**2**) in  $\text{MeOH-}d_4$ .

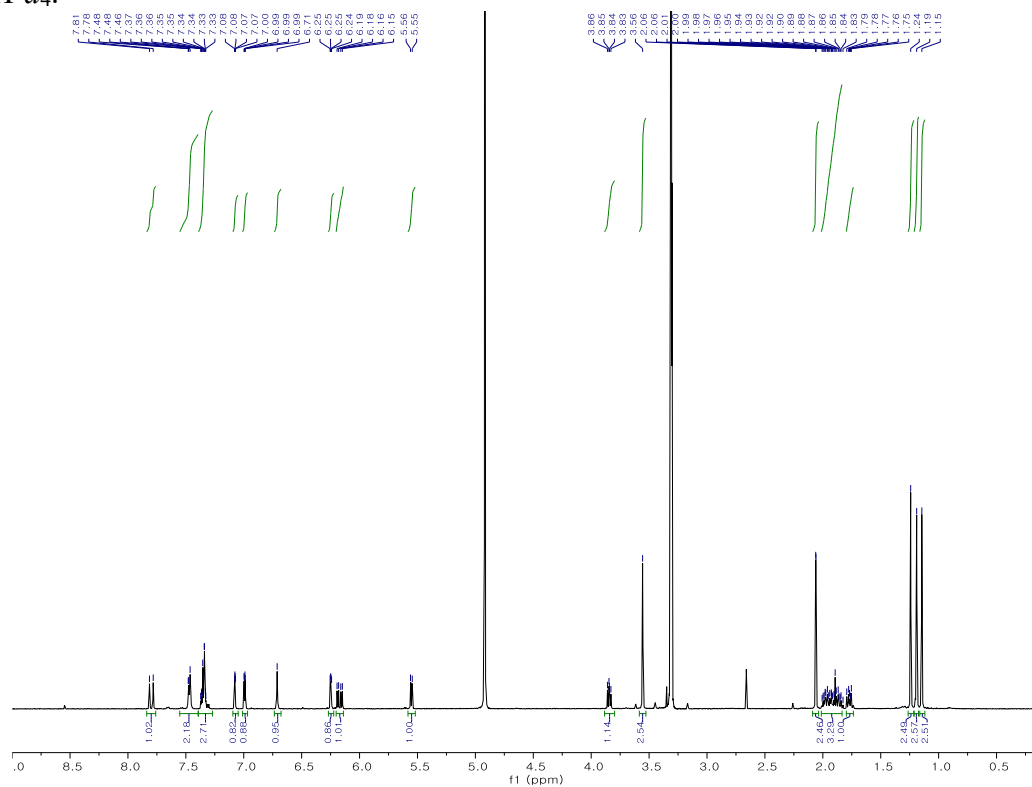

**Figure S33.** COSY NMR spectrum (500 MHz) of *S*-MTPA ester (**7**) for glaciapyrrole E (**2**) in MeOH-*d*<sub>4</sub>.

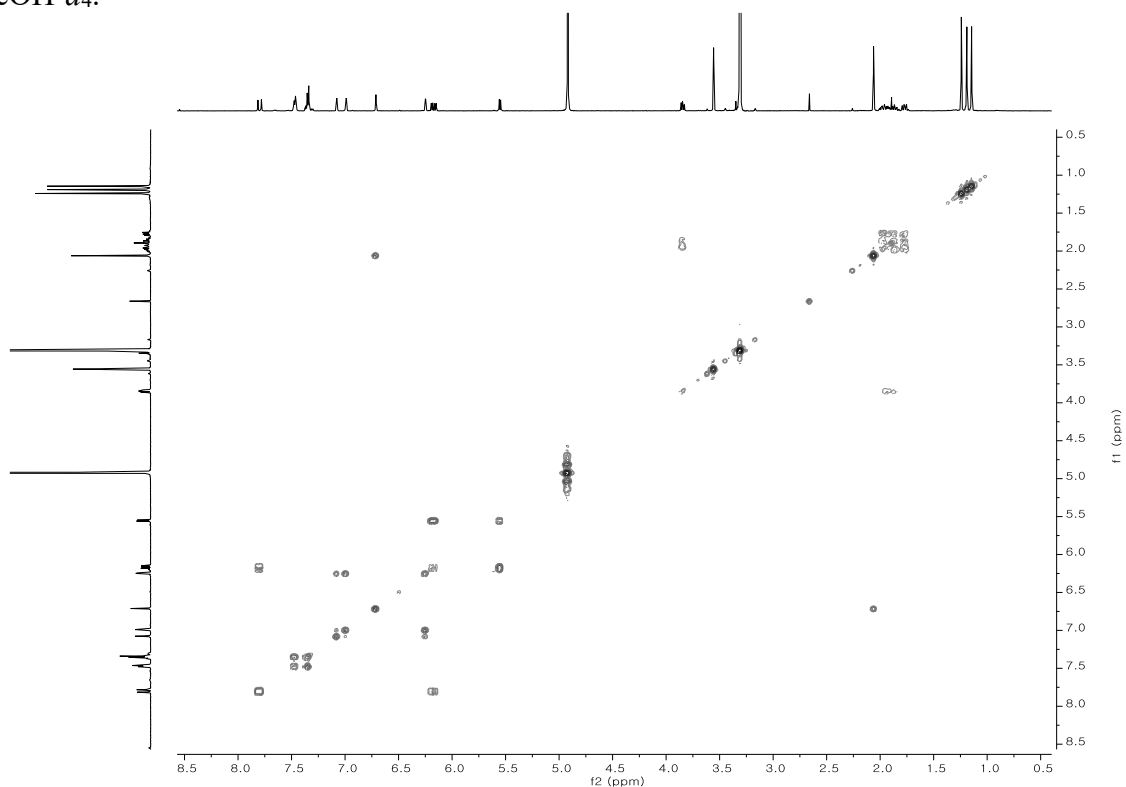

**Figure S34.** <sup>1</sup>H NMR spectrum (500 MHz) of *R*-MTPA ester (**8**) for glaciapyrrole E (**2**) in MeOH-*d*<sub>4</sub>.

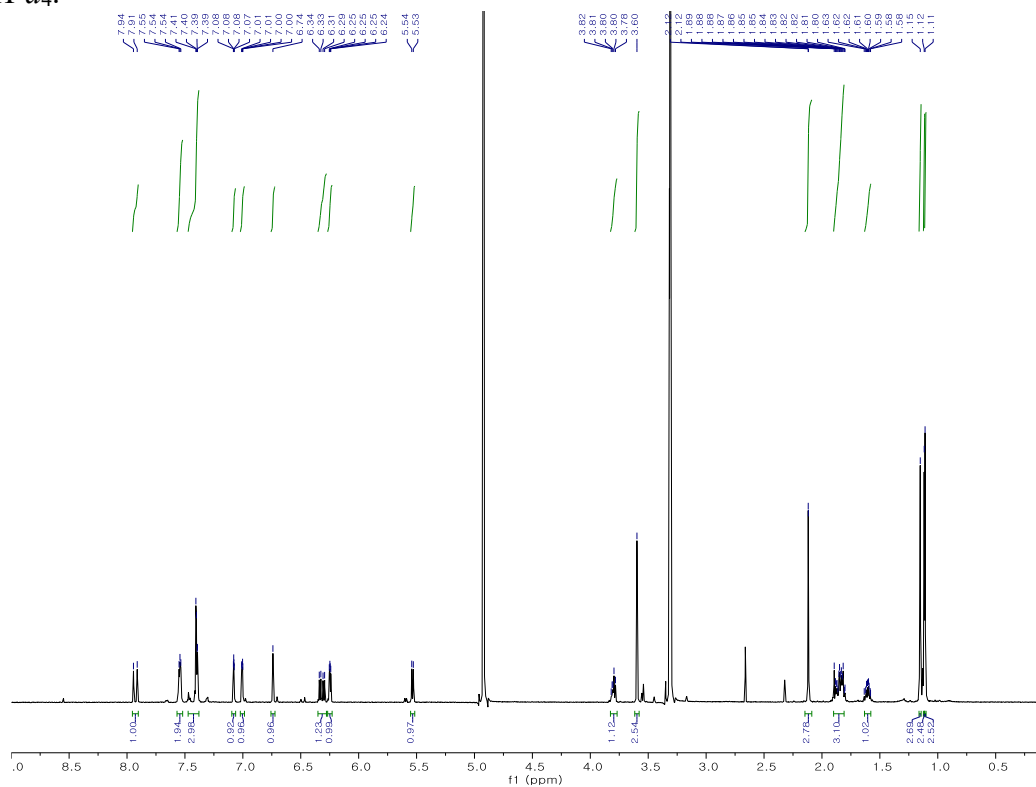

**Figure S35.** COSY NMR spectrum (500 MHz) of *R*-MTPA ester (**8**) for glaciapyrrole E (**2**) in MeOH-*d*<sub>4</sub>.

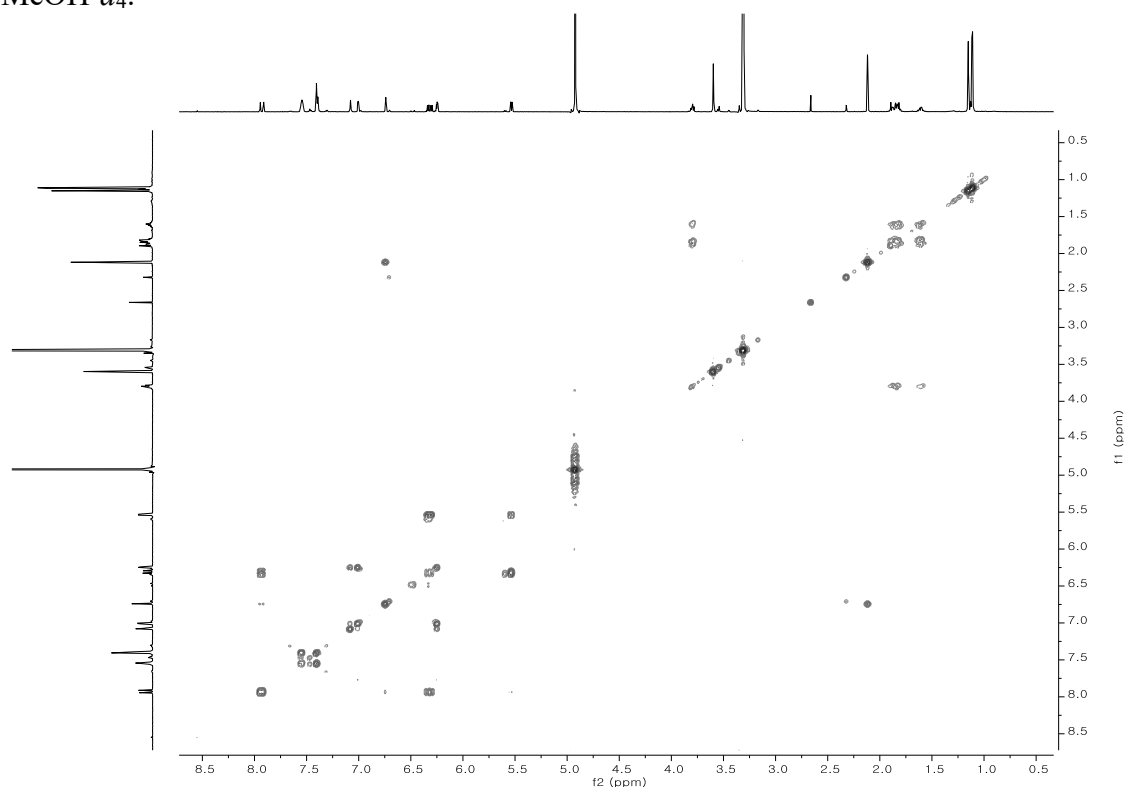

**Figure S36.** HR-FAB-MS data of glaciapyrrole D (**1**)

[Mass Spectrum]  
 Date: FAB-B048 Date: 09-Sep-2020 15:26  
 RT: 0.99 min Scan#: (36,57)  
 Elements: C 100/0, H 100/0, N 10/0, O 10/0  
 Mass Tolerance: : 1000ppm, 5mmu if m/z < 5, 20mmu if m/z > 20  
 Unsaturations (U.S.): 0.0 - 20.0

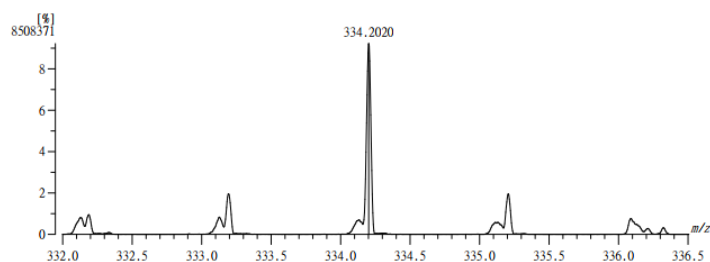

| Observed m/z | Int% | Err[ppm / mmu] | U.S. | Composition    |
|--------------|------|----------------|------|----------------|
| 1 334.2020   | 9.22 | -41.1 / -13.7  | 11.0 | G21 H26 N4     |
| 2            |      | -3.5 / -1.2    | 11.5 | G20 H24 N5     |
| 3            |      | +34.1 / +11.4  | 12.0 | C19 H22 N6     |
| 4            |      | -45.2 / -15.1  | 10.5 | C23 H28 N O    |
| 5            |      | -7.5 / -2.5    | 11.0 | G22 H26 N2 O   |
| 6            |      | +30.1 / +10.1  | 11.5 | G21 H24 N3 O   |
| 7            |      | -25.1 / -8.4   | 7.5  | C14 H24 N9 O   |
| 8            |      | +12.6 / +4.2   | 8.0  | C13 H22 N10 O  |
| 9            |      | +26.1 / +8.7   | 11.0 | G23 H26 O2     |
| 10           |      | -29.1 / -9.7   | 7.0  | C16 H26 N6 O2  |
| 11           |      | +8.5 / +2.9    | 7.5  | C15 H24 N7 O2  |
| 12           |      | +46.2 / +15.4  | 8.0  | C14 H22 N8 O2  |
| 13           |      | -33.1 / -11.1  | 6.5  | C18 H28 N3 O3  |
| 14           |      | +4.5 / +1.5    | 7.0  | C17 H26 N4 O3  |
| 15           |      | +42.1 / +14.1  | 7.5  | C16 H24 N5 O3  |
| 16           |      | -50.7 / -16.9  | 3.0  | C10 H26 N10 O3 |
| 17           |      | -37.1 / -12.4  | 6.0  | G20 H30 O4     |
| 18           |      | +0.5 / +0.2    | 6.5  | C19 H28 N O4   |
| 19           |      | +38.1 / -12.7  | 7.0  | C18 H26 N2 O4  |
| 20           |      | -54.7 / -18.3  | 2.5  | C12 H28 N7 O4  |
| 21           |      | -17.1 / -5.7   | 3.0  | C11 H26 N8 O4  |
| 22           |      | +20.6 / +6.9   | 3.5  | C10 H24 N9 O4  |
| 23           |      | +58.2 / +19.5  | 4.0  | C9 H22 N10 O4  |
| 24           |      | -58.7 / -19.6  | 2.0  | C14 H30 N4 O5  |
| 25           |      | -21.1 / -7.0   | 2.5  | C13 H28 N5 O5  |
| 26           |      | +16.6 / +5.5   | 3.0  | C12 H26 N6 O5  |
| 27           |      | +54.2 / +18.1  | 3.5  | C11 H24 N7 O5  |
| 28           |      | -25.1 / -8.4   | 2.0  | C15 H30 N2 O6  |
| 29           |      | +12.5 / +4.2   | 2.5  | C14 H28 N3 O6  |
| 30           |      | +50.2 / +16.8  | 3.0  | C13 H26 N4 O6  |
| 31           |      | +8.5 / +2.8    | 2.0  | C16 H30 O7     |
| 32           |      | +46.1 / +15.4  | 2.5  | C15 H28 N O7   |

Figure S37. HR-FAB-MS data of glaciapyrrole E (2)

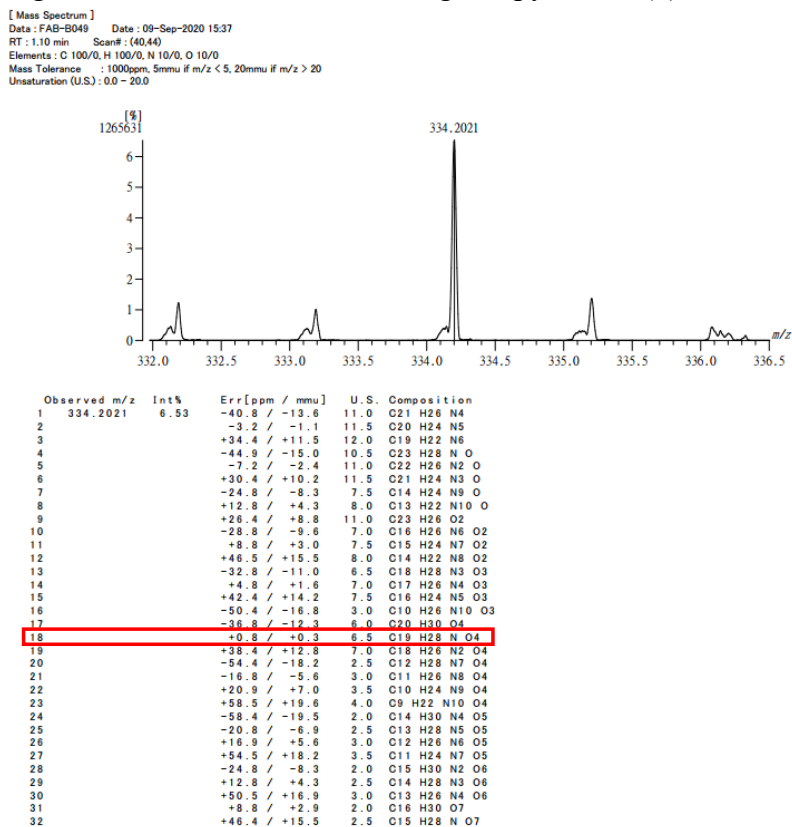

Figure S38. HR-FAB-MS data of photoglaciapyrrole D (4)

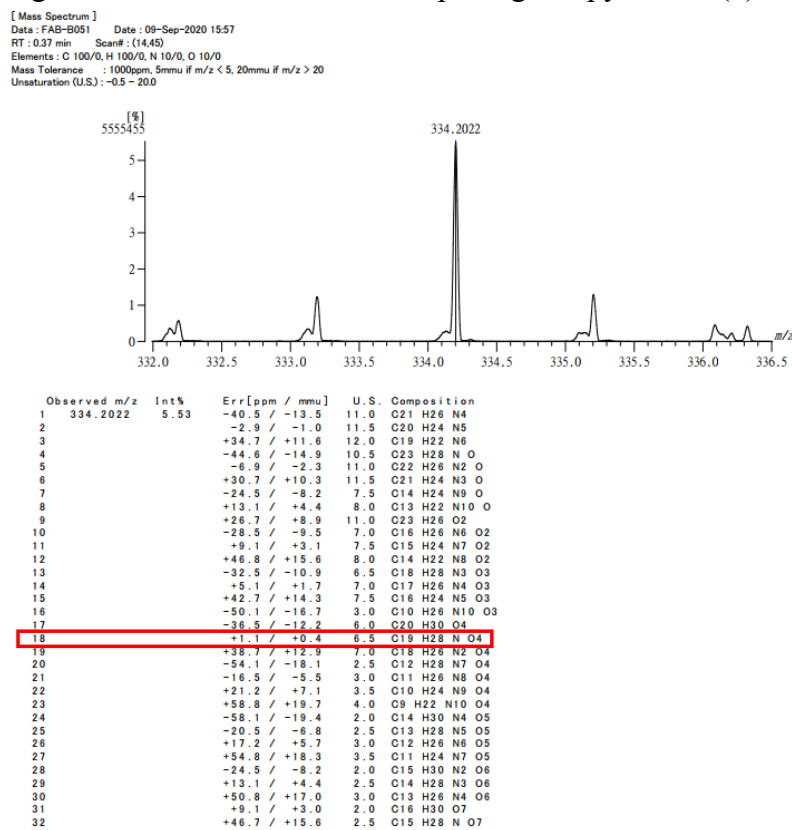

Figure S39. HR-FAB-MS data of photoglaciapyrrole E (5)

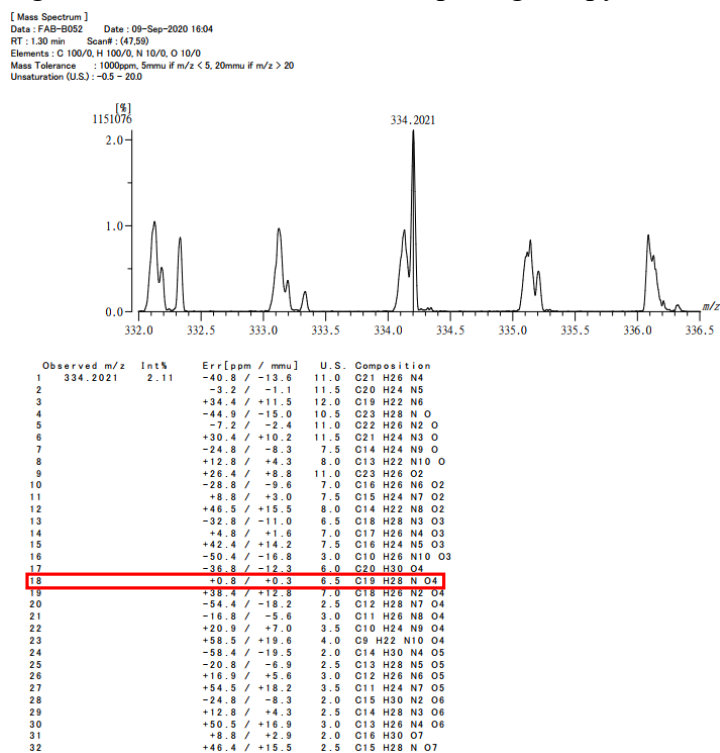

Figure S40. HR-FAB-MS data of photoglaciapyrrole A (6)

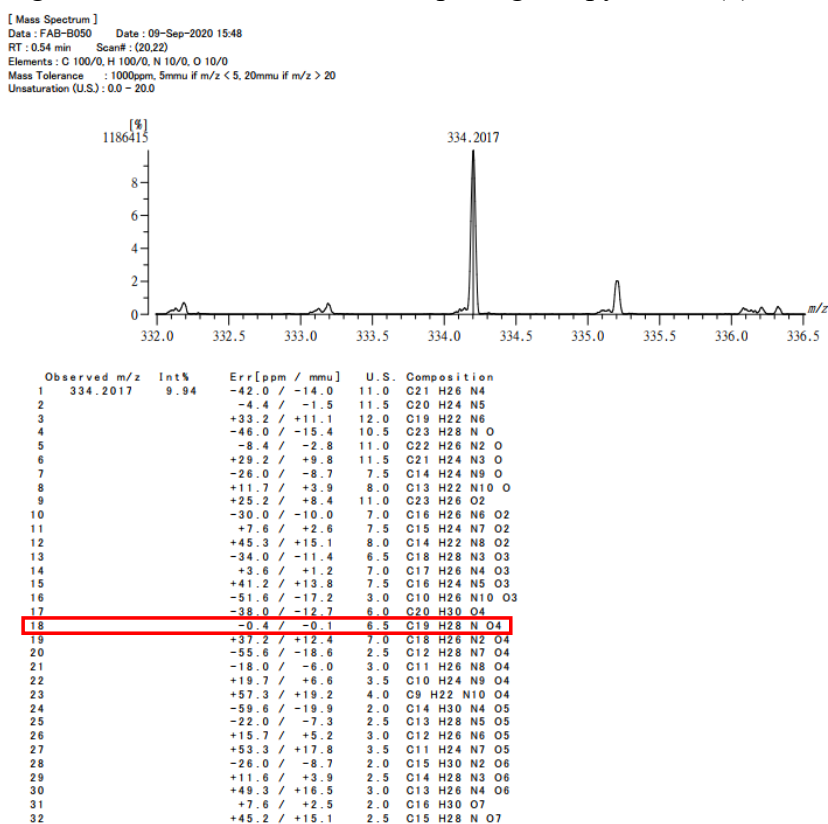



Figure S41. Comparison of the experimental and calculated ECD spectra of glaciapyrrole D (1)

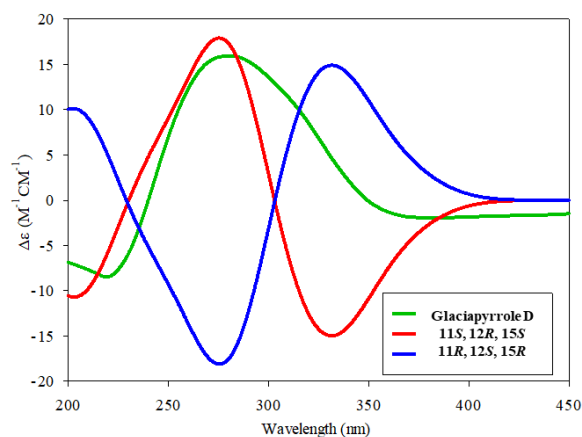

Figure S42.  $^1\text{H}$  NMR signal intensity plot of photoglaciapyrrole A and glaciapyrrole A according to UV (366 nm) irradiation time when purified photoglaciapyrrole was irradiated. Each point is an integration value (an arbitrary unit) of  $^1\text{H}$  NMR signals at H-9 position of corresponding compounds.

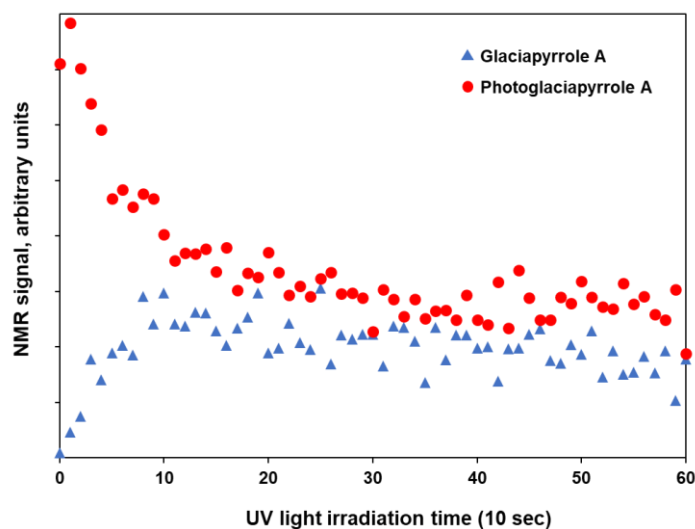

Figure S43. A proposed reversible mechanism for the double bond photoisomerism.

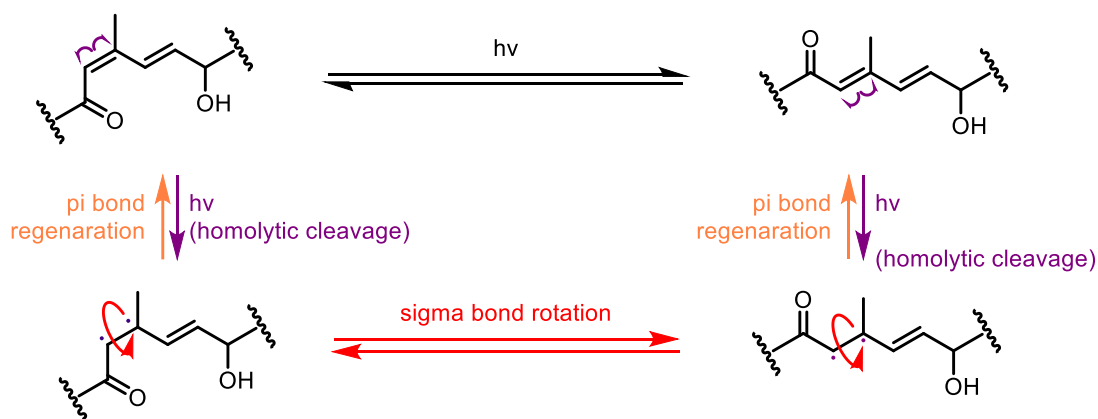

**Table S1.** Cartesian coordinates of glaciapyrrole D (1)

| No. | atom | Cartesian coordinates |                    |                   |
|-----|------|-----------------------|--------------------|-------------------|
| 1   | C    | 0.96932135084961      | -5.61460885106199  | 1.12766072651951  |
| 2   | C    | 1.04952493729919      | -8.24531280094804  | 1.06212453444250  |
| 3   | C    | 3.39207112768224      | -4.73541664858595  | 0.40936597877594  |
| 4   | C    | 4.89499821614879      | -6.85528617501927  | -0.07942600560488 |
| 5   | N    | 3.40954070441186      | -8.94944145890722  | 0.33720343335780  |
| 6   | H    | -0.66499973163303     | -4.46961736932586  | 1.63888062553236  |
| 7   | H    | -0.40900304689316     | -9.63755278226243  | 1.48234981404169  |
| 8   | H    | 3.98183409302655      | -2.76882589923946  | 0.26361398505318  |
| 9   | C    | 7.52536879793155      | -7.27879478987752  | -0.88555230529162 |
| 10  | O    | 8.26130681033872      | -9.47819106250595  | -1.14475269872130 |
| 11  | C    | 9.07076710096588      | -4.99400996291127  | -1.32167360049907 |
| 12  | C    | 11.54159385591278     | -4.85385406039956  | -2.05787133657744 |
| 13  | H    | 8.07814518580659      | -3.20628082503334  | -1.01685483239013 |
| 14  | C    | 12.73638448563917     | -2.28520453833520  | -2.42318672006109 |
| 15  | H    | 11.39739216806139     | -0.74749510035792  | -1.99698629074190 |
| 16  | H    | 13.39842370582684     | -2.03823442284213  | -4.39044735128102 |
| 17  | H    | 14.40991715854982     | -2.05253383549662  | -1.19342589817335 |
| 18  | C    | 13.08233169991428     | -7.10273284043860  | -2.51699157270412 |
| 19  | C    | 15.48701066259627     | -7.07853072276492  | -3.35997336454322 |
| 20  | H    | 12.17343016850981     | -8.91470582237521  | -2.15095260271291 |
| 21  | C    | 17.00260833342658     | -9.42290934434609  | -3.86705266486455 |
| 22  | H    | 16.49816765175353     | -5.32119002129927  | -3.77375238710533 |
| 23  | H    | 4.10579636050773      | -10.72176523079488 | 0.10100515878806  |
| 24  | O    | 15.67807189234031     | -11.57448718347319 | -3.01816515699599 |
| 25  | C    | 19.73792205578110     | -9.33233012328152  | -2.74694271388809 |
| 26  | H    | 17.26568614812913     | -9.56353007228683  | -5.96024030962895 |
| 27  | C    | 21.03278022184694     | -11.86158706966780 | -3.39895078877584 |
| 28  | C    | 19.43990859142302     | -14.16638737758696 | -2.64659369614851 |
| 29  | H    | 22.92018855523571     | -11.91995090396591 | -2.50863720574618 |
| 30  | H    | 21.34591024262572     | -11.90199134944655 | -5.47332138854095 |
| 31  | C    | 16.76469569743993     | -13.92185748294825 | -3.72864488355384 |
| 32  | H    | 19.34470697740708     | -14.30934822314878 | -0.56895557624601 |
| 33  | H    | 20.30714332605456     | -15.92996457708791 | -3.33863768539612 |
| 34  | O    | 21.08429868747662     | -7.27960995321047  | -3.85947574518610 |
| 35  | C    | 19.70820996953827     | -8.81592703264962  | 0.09336956159247  |
| 36  | H    | 18.47156967211926     | -10.15992433734439 | 1.09406377703173  |
| 37  | H    | 19.00434420074620     | -6.88934513220549  | 0.46203126879528  |
| 38  | H    | 21.64102345990228     | -8.95806017920458  | 0.86704003525333  |
| 39  | H    | 21.41637773653345     | -7.68909461944443  | -5.62084224620473 |
| 40  | C    | 14.89375782568925     | -16.06415243121184 | -2.99573267697676 |
| 41  | H    | 16.91899736605682     | -13.96499355173732 | -5.83144144856026 |
| 42  | C    | 12.33681464194023     | -15.64194299481193 | -4.30107552369166 |
| 43  | H    | 11.38200446985369     | -13.92618381635404 | -3.60379636640411 |
| 44  | H    | 12.58642520761713     | -15.43730403590606 | -6.36993160290469 |
| 45  | H    | 11.10248642000718     | -17.28867677688357 | -3.95426335974419 |
| 46  | C    | 14.53949190547866     | -16.29752108799655 | -0.13665458965494 |
| 47  | H    | 13.08561150644289     | -17.73519322752152 | 0.27540692333436  |
| 48  | H    | 13.93609376725062     | -14.47617994733949 | 0.67562067638090  |
| 49  | H    | 16.30604159601510     | -16.90944342177173 | 0.78546625431803  |
| 50  | O    | 15.97209879266044     | -18.40804387584918 | -3.81307118913745 |
| 51  | H    | 15.86328952457206     | -18.47818055265714 | -5.64644397844336 |

**Table S2.** Cartesian coordinates of *ent*-glaciapyrrole D (**1**)

| No. | atom | Cartesian coordinates |                    |                   |
|-----|------|-----------------------|--------------------|-------------------|
| 1   | C    | 2.25664393778993      | -3.74205025139863  | -0.54481587673106 |
| 2   | C    | 2.92721237200253      | -6.26376845009227  | -0.19410629011241 |
| 3   | C    | 4.46004751998871      | -2.27841505645686  | -0.14190520519636 |
| 4   | C    | 6.42612002596234      | -3.94597598618377  | 0.44619340843299  |
| 5   | N    | 5.42428551341945      | -6.34588767776241  | 0.39656458745777  |
| 6   | H    | 9.12849760857656      | -3.68829652240720  | 1.06092415725246  |
| 7   | H    | 10.35292694172995     | -5.62648936069191  | 1.49654749087811  |
| 8   | H    | 10.14616595965486     | -1.08835642509331  | 1.10661515951867  |
| 9   | C    | 12.56302683914200     | -0.32895035078369  | 1.60480526175425  |
| 10  | O    | 13.17255586415374     | 2.46146039032447   | 1.58184886929990  |
| 11  | C    | 14.67485192073952     | 2.89129384708425   | 0.19443850595323  |
| 12  | C    | 13.87877187303410     | 3.09156561263876   | 3.44526315622878  |
| 13  | H    | 11.49994450786491     | 3.60881069279797   | 1.10651013042904  |
| 14  | C    | 8.76135905337719      | 0.39076703349252   | 0.69520291652925  |
| 15  | H    | 14.59406645362797     | -2.11782885149552  | 2.16858694088742  |
| 16  | H    | 16.97112771537259     | -1.46973266640396  | 2.81765662301392  |
| 17  | H    | 14.10005570195966     | -4.11485703366072  | 2.06143452172160  |
| 18  | C    | 19.00404781125247     | -3.34929489076749  | 3.43790224376312  |
| 19  | C    | 17.57639000822748     | 0.50264240046879   | 2.97737641757513  |
| 20  | H    | 18.17583703261371     | -5.82070715815372  | 2.88204157514243  |
| 21  | C    | 21.59536870134579     | -2.76575569925970  | 2.13683226725180  |
| 22  | H    | 19.38206724539159     | -3.20598144368226  | 5.51357827426385  |
| 23  | H    | 22.47667539455797     | -0.35502136860752  | 2.95675626400471  |
| 24  | O    | 21.32904968873359     | -2.58151232246704  | -0.73207418031230 |
| 25  | C    | 20.17497358545990     | -0.92130270264308  | -1.23740092969711 |
| 26  | H    | 20.40599808001851     | -4.27529007401544  | -1.51597044833415 |
| 27  | C    | 23.20812962526553     | -2.35756040687740  | -1.61113877326089 |
| 28  | C    | 23.46469262011041     | -4.85360970731457  | 2.94466108003068  |
| 29  | H    | 22.41576210173645     | -7.52567641379692  | 2.52595794888742  |
| 30  | H    | 23.86493716993158     | -4.59539883551106  | 4.98846037635664  |
| 31  | C    | 25.27675714982016     | -4.58425557983039  | 1.94288743758279  |
| 32  | H    | 19.80087065628647     | -7.77320084819656  | 3.74566843284322  |
| 33  | H    | 23.69289700209472     | -8.96233817930630  | 3.32969962264034  |
| 34  | O    | 22.27381813780158     | -7.91475244974500  | 0.48280937238153  |
| 35  | C    | 18.44713334585970     | -10.34792330682322 | 3.34096928649450  |
| 36  | H    | 20.04330352616684     | -7.55249333566456  | 5.82942226744089  |
| 37  | H    | 15.91532205223094     | -10.37403112623208 | 4.75936799079508  |
| 38  | H    | 14.56535956093426     | -8.99960156430771  | 3.96574984702956  |
| 39  | H    | 15.07862760992736     | -12.28297269916403 | 4.64830383881085  |
| 40  | C    | 16.19483407880352     | -9.90018386200787  | 6.77954410315522  |
| 41  | H    | 18.04375269659275     | -10.96314214030427 | 0.54579927084003  |
| 42  | C    | 16.99932650448196     | -9.42690549560397  | -0.39706772339944 |
| 43  | H    | 16.95189552465900     | -12.73120342368689 | 0.36796956027226  |
| 44  | H    | 19.86601315368477     | -11.24809468644476 | -0.42513834986484 |
| 45  | H    | 20.06901493170117     | -12.28676723037806 | 4.30895846523045  |
| 46  | C    | 6.51266562531095      | -7.88221956892973  | 0.76644228554026  |
| 47  | H    | 0.37992566542561      | -3.04946738661432  | -1.03642428216553 |
| 48  | H    | 1.79433601289625      | -7.97863912160578  | -0.32696097621597 |
| 49  | H    | 4.60172108154654      | -0.22868853471974  | -0.26670674025774 |
| 50  | O    | 22.96676727666866     | -0.48553114800460  | 4.72388717478719  |
| 51  | H    | 20.06053112244159     | -12.17547178137035 | 6.14355747098986  |

**Table S3.** ECD calculations of glaciapyrrole D (**1**)(a) ECD calculations of glaciapyrrole D (**1**).

total energy = -1094.363684814

kinetic energy = 1084.304734068

potential energy = -2178.668418882

Parameters of Level DFT

DFT settings (Functional B3LYP / Gridsize M3)

Geometry optimization options (Energy 10<sup>-6</sup> Hartree, Gradient norm |dE / dxyz| = 10<sup>-3</sup> Hartree/Bohr)

Energy minimized coordinates of glaciapyrrole D at the basis set def2-TVZPP for all atoms (Å).

| atomic coordinates |              |             | atom | charge |
|--------------------|--------------|-------------|------|--------|
| 0.96721532         | -5.61715159  | 1.12096379  | C    | 6      |
| 1.04924683         | -8.24784632  | 1.05690747  | C    | 6      |
| 3.39018209         | -4.73671587  | 0.40475710  | C    | 6      |
| 4.89506851         | -6.85587058  | -0.08126102 | C    | 6      |
| 3.41053213         | -8.95077226  | 0.33490791  | N    | 7      |
| -0.66839739        | -4.47297969  | 1.62992311  | H    | 1      |
| -0.40882924        | -9.64083173  | 1.47625383  | H    | 1      |
| 3.97873704         | -2.76979183  | 0.25842178  | H    | 1      |
| 7.52643982         | -7.27817347  | -0.88477536 | C    | 6      |
| 8.26397996         | -9.47724732  | -1.14214249 | O    | 8      |
| 9.07098793         | -4.99279269  | -1.32067237 | C    | 6      |
| 11.54202348        | -4.85221483  | -2.05600489 | C    | 6      |
| 8.07763389         | -3.20532227  | -1.01660776 | H    | 1      |
| 12.73705250        | -2.28349525  | -2.42010040 | C    | 6      |
| 11.39793456        | -0.74586356  | -1.99401079 | H    | 1      |
| 13.39991725        | -2.03598604  | -4.38701245 | H    | 1      |
| 14.41007539        | -2.05122865  | -1.18956775 | H    | 1      |
| 13.08271079        | -7.10115067  | -2.51482494 | C    | 6      |
| 15.48729339        | -7.07744825  | -3.35808901 | C    | 6      |
| 12.17369697        | -8.91299898  | -2.14837505 | H    | 1      |
| 17.00233174        | -9.42235074  | -3.86470443 | C    | 6      |
| 16.49865831        | -5.32037959  | -3.77251673 | H    | 1      |
| 4.10819352         | -10.72276303 | 0.10038056  | H    | 1      |
| 15.67797569        | -11.57403729 | -3.01597749 | O    | 8      |
| 19.73877009        | -9.33278974  | -2.74747594 | C    | 6      |
| 17.26404946        | -9.56325523  | -5.95800107 | H    | 1      |
| 21.03208553        | -11.86190857 | -3.40337785 | C    | 6      |
| 19.43946476        | -14.16688049 | -2.65051328 | C    | 6      |
| 22.92084993        | -11.92155352 | -2.51607367 | H    | 1      |
| 21.34194494        | -11.90074779 | -5.47829398 | H    | 1      |
| 16.76296501        | -13.92127113 | -3.72928140 | C    | 6      |
| 19.34657821        | -14.31092642 | -0.57280698 | H    | 1      |
| 20.30559238        | -15.93024953 | -3.34443570 | H    | 1      |
| 21.08425812        | -7.27946877  | -3.85983733 | O    | 8      |
| 19.71241267        | -8.81914808  | 0.09339963  | C    | 6      |
| 18.47669780        | -10.16394360 | 1.09415874  | H    | 1      |
| 19.00935560        | -6.89281048  | 0.46485073  | H    | 1      |
| 21.64609103        | -8.96244704  | 0.86467446  | H    | 1      |
| 21.41415441        | -7.68755295  | -5.62192651 | H    | 1      |
| 14.89267044        | -16.06321108 | -2.99377917 | C    | 6      |
| 16.91421229        | -13.96382225 | -5.83232923 | H    | 1      |
| 12.33371228        | -15.64010454 | -4.29488124 | C    | 6      |
| 11.38051913        | -13.92420358 | -3.59574697 | H    | 1      |
| 12.57997013        | -15.43519703 | -6.36411085 | H    | 1      |
| 11.09951092        | -17.28655044 | -3.94629966 | H    | 1      |

|             |              |             |   |   |
|-------------|--------------|-------------|---|---|
| 14.54303983 | -16.29685422 | -0.13416084 | C | 6 |
| 13.08945763 | -17.73418447 | 0.28013049  | H | 1 |
| 13.94149683 | -14.47545586 | 0.67935128  | H | 1 |
| 16.31096017 | -16.90936930 | 0.78494787  | H | 1 |
| 15.96909860 | -18.40726777 | -3.81318729 | O | 8 |
| 15.85730360 | -18.47711953 | -5.64638190 | H | 1 |

(b) ECD calculations of *ent*-glaciapyrrole D (**1**).

total energy = -1094.363688077

kinetic energy = 1084.303769185

potential energy = -2178.667457262

Parameters of Level DFT

DFT settings (Functional B3LYP / Gridsize M3)

Geometry optimization options (Energy 10<sup>-6</sup> Hartree, Gradient norm |dE / dxyz| = 10<sup>-3</sup> Hartree/Bohr)

Energy minimized coordinates of *ent*-glaciapyrrole D at the basis set def2-TVZPP for all atoms (Å).

| atomic coordinates |              |             | atom | charge |
|--------------------|--------------|-------------|------|--------|
| 2.25979306         | -3.74511852  | -0.5497837  | C    | 6      |
| 2.93100422         | -6.26646811  | -0.19761984 | C    | 6      |
| 4.46224210         | -2.28050228  | -0.14507916 | C    | 6      |
| 6.42835383         | -3.94714441  | 0.44557737  | C    | 6      |
| 5.42742389         | -6.34740894  | 0.39588549  | N    | 7      |
| 9.13025769         | -3.68846193  | 1.06216235  | C    | 6      |
| 10.35483420        | -5.62608365  | 1.49942043  | O    | 8      |
| 10.14726925        | -1.08821656  | 1.10759589  | C    | 6      |
| 12.56385130        | -0.32827968  | 1.60644093  | C    | 6      |
| 13.17293630        | 2.46224451   | 1.58361469  | C    | 6      |
| 14.67558991        | 2.89234009   | 0.19667239  | H    | 1      |
| 13.87848119        | 3.09247656   | 3.44724651  | H    | 1      |
| 11.50026198        | 3.60930703   | 1.10776865  | H    | 1      |
| 8.76223139         | 0.39056010   | 0.69564218  | H    | 1      |
| 14.59492545        | -2.11694750  | 2.17079400  | C    | 6      |
| 16.97209111        | -1.46889817  | 2.81947938  | C    | 6      |
| 14.10083237        | -4.11397610  | 2.06420337  | H    | 1      |
| 19.00467848        | -3.34875526  | 3.43977486  | C    | 6      |
| 17.57764391        | 0.50341339   | 2.97881715  | H    | 1      |
| 18.17515786        | -5.81970414  | 2.88385141  | O    | 8      |
| 21.59530219        | -2.76591093  | 2.13683928  | C    | 6      |
| 19.38359828        | -3.20535084  | 5.51531389  | H    | 1      |
| 22.47852454        | -0.35626376  | 2.95779101  | O    | 8      |
| 21.32655444        | -2.57920567  | -0.73172934 | C    | 6      |
| 20.17294229        | -0.91794833  | -1.23464310 | H    | 1      |
| 20.40185673        | -4.27182647  | -1.51615168 | H    | 1      |
| 23.20494438        | -2.35556125  | -1.61235065 | H    | 1      |
| 23.46445210        | -4.85514479  | 2.94153037  | C    | 6      |
| 22.41394673        | -7.52628639  | 2.52147392  | C    | 6      |
| 23.86660833        | -4.59872986  | 4.98517623  | H    | 1      |
| 25.27572155        | -4.58580715  | 1.93832834  | H    | 1      |
| 19.80062260        | -7.77317561  | 3.74440269  | C    | 6      |
| 23.69136139        | -8.96432501  | 3.32230140  | H    | 1      |
| 22.26911098        | -7.91332668  | 0.47816167  | H    | 1      |
| 18.44520169        | -10.34727535 | 3.34170114  | C    | 6      |
| 20.04611023        | -7.55293541  | 5.82783517  | H    | 1      |
| 15.91567910        | -10.37222069 | 4.76415951  | C    | 6      |

|             |              |             |   |   |
|-------------|--------------|-------------|---|---|
| 14.56503299 | -8.99721254  | 3.97274185  | H | 1 |
| 15.07796985 | -12.28078769 | 4.65447776  | H | 1 |
| 16.19866997 | -9.89846547  | 6.78387397  | H | 1 |
| 18.03713715 | -10.96231786 | 0.54718102  | C | 6 |
| 16.99198724 | -9.42559067  | -0.39405900 | H | 1 |
| 16.94411590 | -12.72982489 | 0.37109357  | H | 1 |
| 19.85773056 | -11.24821226 | -0.42659736 | H | 1 |
| 20.06777966 | -12.28678048 | 4.30720989  | O | 8 |
| 6.51586060  | -7.88317974  | 0.76788457  | H | 1 |
| 0.38326498  | -3.05339861  | -1.04338006 | H | 1 |
| 1.79904098  | -7.98186184  | -0.33150106 | H | 1 |
| 4.60323646  | -0.23073301  | -0.27029034 | H | 1 |
| 22.97002282 | -0.48835696  | 4.72442029  | H | 1 |
| 20.06221537 | -12.17542336 | 6.14182559  | H | 1 |
